# Supplementary material
Source: PubMed Central journal article supplement (PMC3910497)

**Supplementary Table 1:** Description of participating case studies

| Study Name                                                                                   | Country of Origin | GWAS Stage 1A       |                                   | GWAS Stage 1B       |                                   | Stage 1A + 1B |    |      | CEU Taqman replication |
|----------------------------------------------------------------------------------------------|-------------------|---------------------|-----------------------------------|---------------------|-----------------------------------|---------------|----|------|------------------------|
|                                                                                              |                   | No. Cases genotyped | No. Cases passed QC (in analysis) | No. Cases genotyped | No. Cases passed QC (in analysis) | CEU           | AA | HISP |                        |
| Children's Oncology Group                                                                    | USA               | 608                 | 595                               |                     |                                   | 374           | 86 | 93   | 41                     |
| Universidad de Navarra, Pamplona                                                             | Spain             | 88                  | 81                                | 12                  | 12                                | 89            | 1  | 1    | 6                      |
| University of Toronto, Litwin Centre for Cancer Genetics, Mt Sinai Hospital                  | Canada            | 104                 | 101                               |                     |                                   | 75            | 9  | 5    | 2                      |
| Royal National Orthopaedic Hospital NHS Trust and University College London Cancer Institute | UK                | 53                  | 46                                | 48                  | 37                                | 71            | 1  |      | 52                     |
| Istituto Ortopedico Rizzoli                                                                  | Italy             | 27                  | 25                                | 51                  | 48                                | 76            |    |      | 6                      |
| Peter MacCallum Cancer Centre, East Melbourne, VIC                                           | Australia         |                     |                                   | 15                  | 10                                | 9             |    |      | 13                     |
| Ankara Oncology and Education Research Hospital                                              | Turkey            | 30                  | 27 <sup>a</sup>                   |                     |                                   |               |    |      | 4                      |
| Harvard School of Dental Medicine                                                            | USA               |                     |                                   |                     |                                   |               |    |      | 91                     |
| Instituto de Oncologia Pediátrica GRAACC/UNIFESP and Universidade Federal de Sao Paulo       | Brazil            |                     |                                   |                     |                                   |               |    |      | 32                     |
| Total                                                                                        |                   | 910                 | 875                               | 126                 | 107                               | 694           | 97 | 99   | 247                    |

<sup>a</sup> For the CEU model, subjects were excluded with <80% European ancestry, Ankara individuals were excluded.

**Supplementary Table 2:** Association results of the 30 SNPs analyzed in the combined GWAS

| LOCUS      | CYTOBAND | LOCATION  | GENE NEIGHBORHOOD                     | ALLELES (REF EFF) | GWAS Stage 1A |             |          | GWAS Stage 1A+1B |             |          | Taqman |             |          | GWAS + Taqman |             |          |
|------------|----------|-----------|---------------------------------------|-------------------|---------------|-------------|----------|------------------|-------------|----------|--------|-------------|----------|---------------|-------------|----------|
|            |          |           |                                       |                   | OR            | 95%CI       | P        | OR               | 95%CI       | P        | OR     | 95%CI       | P        | OR            | 95%CI       | P        |
| rs1906953  | 6p21.31  | 34144424  | GRM4                                  | G A               | 1.59          | (1.31-1.93) | 2.00E-06 | 1.45             | (1.21-1.73) | 4.00E-05 | 2.00   | (1.47-2.72) | 6.54E-06 | 1.57          | (1.35-1.83) | 8.05E-09 |
| rs12545104 | 8p23.3   | 1808923   | ARHGEF10, KIAA0294                    | A G               | 1.37          | (1.20-1.57) | 4.00E-06 | 1.36             | (1.20-1.54) | 2.00E-06 | 1.03   | (0.83-1.29) | 7.70E-01 | 1.27          | (1.14-1.42) | 1.86E-05 |
| rs8036460  | 15q14    | 35905945  |                                       | C A               | 1.43          | (1.23-1.67) | 5.00E-06 | 1.44             | (1.24-1.67) | 2.00E-06 | 1.00   | (0.78-1.28) | 9.86E-01 | 1.3           | (1.15-1.48) | 5.83E-05 |
| rs4632189  | 17q23.1  | 55403697  | RNFT1, AK097658, DHX40P               | T G               | 1.84          | (1.41-2.40) | 7.00E-06 | 1.71             | (1.31-2.23) | 6.90E-05 | 1.39   | (0.94-2.05) | 1.01E-01 | 1.6           | (1.29-2.00) | 2.55E-05 |
| rs573666   | 13q14.3  | 50092406  | AJ412031                              | G A               | 0.72          | (0.63-0.83) | 8.00E-06 | 0.7              | (0.61-0.80) | 2.57E-07 | 1.00   | (0.79-1.25) | 9.82E-01 | 0.77          | (0.68-0.86) | 8.59E-06 |
| rs1467345  | 7p21.3   | 11750442  | THSD7A                                | C T               | 1.51          | (1.26-1.82) | 8.00E-06 | 1.44             | (1.21-1.72) | 4.00E-05 | 0.79   | (0.58-1.08) | 1.35E-01 | 1.24          | (1.07-1.45) | 4.64E-03 |
| rs12531253 | 7p15.1   | 28824131  | CREB5                                 | A G               | 1.4           | (1.20-1.62) | 1.20E-05 | 1.39             | (1.20-1.61) | 1.50E-05 | 1.00   | (0.78-1.28) | 9.89E-01 | 1.27          | (1.12-1.44) | 2.11E-04 |
| rs10208273 | 2p25.2   | 6441445   |                                       | T C               | 1.37          | (1.19-1.58) | 1.40E-05 | 1.37             | (1.20-1.56) | 3.00E-06 | 1.31   | (1.03-1.67) | 2.72E-02 | 1.35          | (1.21-1.52) | 2.93E-07 |
| rs11673716 | 2q23.3   | 153981721 |                                       | T C               | 1.45          | (1.23-1.72) | 1.50E-05 | 1.44             | (1.22-1.68) | 1.00E-05 | 1.13   | (0.85-1.50) | 4.13E-01 | 1.35          | (1.18-1.56) | 2.06E-05 |
| rs10025742 | 4p15.1   | 27934026  |                                       | A G               | 1.38          | (1.19-1.61) | 1.70E-05 | 1.34             | (1.16-1.54) | 5.50E-05 | 1.20   | (0.92-1.57) | 1.85E-01 | 1.31          | (1.15-1.48) | 2.79E-05 |
| rs2888638  | 2p22.1   | 39989735  |                                       | T G               | 1.94          | (1.44-2.63) | 1.70E-05 | 1.92             | (1.44-2.55) | 7.00E-06 | 1.30   | (0.73-2.29) | 3.71E-01 | 1.77          | (1.38-2.29) | 1.03E-05 |
| rs2797501  | 10p15.1  | 5844537   | C10orf18, GDI2                        | A G               | 0.58          | (0.45-0.74) | 2.00E-05 | 0.59             | (0.46-0.76) | 4.40E-05 | 0.69   | (0.48-1.01) | 5.23E-02 | 0.62          | (0.51-0.77) | 7.88E-06 |
| rs10762759 | 10q22.3  | 78870123  | KCNMA1                                | T C               | 1.45          | (1.22-1.72) | 2.10E-05 | 1.43             | (1.22-1.69) | 1.50E-05 | 1.00   | (0.73-1.37) | 9.91E-01 | 1.33          | (1.15-1.53) | 1.23E-04 |
| rs7591996  | 2p25.2   | 6378872   |                                       | A C               | 0.75          | (0.65-0.85) | 2.30E-05 | 0.77             | (0.68-0.87) | 4.80E-05 | 0.59   | (0.47-0.74) | 5.71E-06 | 1.39          | (1.23-1.54) | 1.04E-08 |
| rs4551307  | 8q24.21  | 128668854 |                                       | A G               | 1.47          | (1.23-1.76) | 2.80E-05 | 1.49             | (1.25-1.78) | 9.00E-06 | 1.10   | (0.83-1.46) | 4.89E-01 | 1.37          | (1.18-1.59) | 3.59E-05 |
| rs8057015  | 16q23.1  | 76717963  | WVOX                                  | A C               | 0.74          | (0.64-0.85) | 2.90E-05 | 0.76             | (0.67-0.87) | 4.50E-05 | 1.15   | (0.92-1.45) | 2.14E-01 | 0.85          | (0.75-0.95) | 3.71E-03 |
| rs17435970 | 6p23     | 14392006  |                                       | C A               | 1.57          | (1.27-1.94) | 3.20E-05 | 1.47             | (1.20-1.80) | 1.78E-04 | 0.78   | (0.53-1.14) | 1.90E-01 | 1.28          | (1.07-1.53) | 6.97E-03 |
| rs9691873  | 7p15.1   | 28696534  | CREB5                                 | A C               | 0.75          | (0.65-0.86) | 3.30E-05 | 0.75             | (0.66-0.85) | 1.30E-05 | 0.97   | (0.78-1.22) | 8.12E-01 | 0.8           | (0.71-0.89) | 9.61E-05 |
| rs13403411 | 2p25.2   | 6396289   |                                       | C T               | 1.34          | (1.17-1.55) | 3.30E-05 | 1.33             | (1.16-1.51) | 2.20E-05 | 1.23   | (0.97-1.56) | 8.07E-02 | 1.3           | (1.16-1.46) | 5.20E-06 |
| rs2086452  | 15q26.3  | 98546186  | ADAMTS17                              | T C               | 1.35          | (1.17-1.56) | 3.60E-05 | 1.35             | (1.18-1.56) | 2.80E-05 | 1.33   | (1.06-1.66) | 1.26E-02 | 1.35          | (1.19-1.52) | 1.12E-06 |
| rs432364   | 15q26.1  | 90958523  | DQ578058, DQ598297, DQ571124, FAM174B | A C               | 0.74          | (0.64-0.86) | 3.90E-05 | 0.76             | (0.67-0.87) | 7.80E-05 | 0.90   | (0.71-1.13) | 3.54E-01 | 0.79          | (0.71-0.89) | 9.93E-05 |
| rs17206779 | 5q12.3   | 64483533  | ADAMTS6                               | G A               | 0.76          | (0.66-0.86) | 3.90E-05 | 0.76             | (0.67-0.86) | 2.20E-05 | 0.73   | (0.58-0.92) | 6.65E-03 | 0.75          | (0.68-0.84) | 5.07E-07 |
| rs12488867 | 3q25.2   | 155578472 | GPR149                                | C T               | 1.4           | (1.19-1.64) | 4.20E-05 | 1.3              | (1.11-1.51) | 8.24E-04 | 1.20   | (0.91-1.60) | 1.97E-01 | 1.28          | (1.12-1.46) | 3.78E-04 |
| rs11648121 | 16q23.1  | 76739487  | WVOX                                  | G A               | 1.39          | (1.18-1.63) | 5.00E-05 | 1.33             | (1.14-1.54) | 2.57E-04 | 0.73   | (0.54-1.00) | 4.57E-02 | 1.18          | (1.03-1.35) | 1.67E-02 |
| rs17523778 | 15q26.1  | 90957863  | DQ578058, DQ598297, DQ571124, FAM174B | T C               | 0.74          | (0.64-0.86) | 7.30E-05 | 0.76             | (0.66-0.87) | 1.27E-04 | 1.06   | (0.85-1.33) | 6.02E-01 | 0.83          | (0.74-0.94) | 2.91E-03 |
| rs2689326  | 3q25.2   | 155577778 | GPR149                                | C A               | 1.36          | (1.17-1.58) | 8.40E-05 | 1.26             | (1.08-1.45) | 2.25E-03 | 1.13   | (0.87-1.45) | 3.59E-01 | 1.22          | (1.08-1.39) | 1.89E-03 |
| rs1964240  | 7p15.1   | 28818511  | CREB5                                 | C A               | 1.35          | (1.16-1.58) | 9.00E-05 | 1.35             | (1.16-1.57) | 9.10E-05 | 0.90   | (0.70-1.16) | 4.10E-01 | 1.21          | (1.07-1.38) | 3.12E-03 |
| rs2244012  | 5q31.1   | 131929124 | RAD50                                 | A G               | 1.37          | (1.17-1.60) | 9.40E-05 | 1.36             | (1.17-1.58) | 6.20E-05 | 0.96   | (0.73-1.25) | 7.39E-01 | 1.25          | (1.10-1.42) | 8.94E-04 |
| rs11545028 | 16q23.1  | 76691172  | WVOX                                  | C T               | 1.35          | (1.16-1.57) | 9.60E-05 | 1.34             | (1.16-1.56) | 1.09E-04 | 0.74   | (0.57-0.95) | 1.97E-02 | 1.15          | (1.01-1.31) | 2.92E-02 |
| rs8043510  | 15q26.1  | 90960741  | DQ578058, DQ598297, DQ571124, FAM174B | T C               | 1.33          | (1.15-1.53) | 9.60E-05 | 1.31             | (1.15-1.50) | 7.70E-05 | 1.01   | (0.79-1.28) | 9.33E-01 | 1.23          | (1.10-1.38) | 4.73E-04 |

| Supplementary Table 3. Potential regulatory changes of the top SNPs and surrogate markers based on ENCODE and 1000 Genomes Project data |                 |             |     |     |          |           |           |                        |               |                                |                                                                     |                   |                       |
|-----------------------------------------------------------------------------------------------------------------------------------------|-----------------|-------------|-----|-----|----------|-----------|-----------|------------------------|---------------|--------------------------------|---------------------------------------------------------------------|-------------------|-----------------------|
| Chr                                                                                                                                     | Position (hg19) | variant     | Ref | Alt | EA, freq | CEU, freq | YRI, freq | Enhancer histone marks | DNase HS      | Proteins bound                 | Regulatory motifs changed                                           | Regulome DB Score | RefSeq genes          |
| 6                                                                                                                                       | 34036156        | rs73410895  | C   | T   | 0.43     | 0.13      | 0.49      | 1 cell type            | 5 cell types  |                                | HMG-IY, Pou3f2,Pou1f1                                               | 5                 | GRM4                  |
| 6                                                                                                                                       | 34036446        | rs1906953   | C   | T   | 0.46     | 0.13      | 0.56      |                        | 10 cell types |                                |                                                                     | 5                 | GRM4                  |
| 6                                                                                                                                       | 34043298        | rs2499694   | A   | G   | 0.53     | 0.19      | 0.86      | 1 cell type            | 1 cell type   |                                |                                                                     | 5                 | GRM4                  |
| 6                                                                                                                                       | 34044037        | rs4314495   | A   | G   | 0        | 0.18      | 0.86      | 1 cell type            | 3 cell types  |                                |                                                                     | 5                 | GRM4                  |
| 2                                                                                                                                       | 6457585         | rs6739901   | G   | C   | 0.69     | 0.34      | 0.77      |                        |               |                                |                                                                     | No Data           | 329kb 5' of LOC400940 |
| 2                                                                                                                                       | 6461421         | rs7591996   | A   | C   | 0.69     | 0.34      | 0.86      |                        |               |                                |                                                                     | No Data           | 333kb 5' of LOC400940 |
| 2                                                                                                                                       | 6472257         | rs115127385 | C   | G   | 0.58     | 0.24      | 0.24      |                        |               |                                |                                                                     | No Data           | 344kb 5' of LOC400940 |
| 2                                                                                                                                       | 6474304         | rs10179781  | T   | A   | 0.6      | 0.24      | 0.24      | 1 cell type            |               |                                | Hoxb13                                                              | 6                 | 346kb 5' of LOC400940 |
| 2                                                                                                                                       | 6478838         | rs13403411  | G   | A   | 0.56     | 0.24      | 0.24      | 1 cell type            |               |                                | RP58, TAI-1a:E47                                                    | 6                 | 350kb 5' of LOC400940 |
| 2                                                                                                                                       | 6486625         | rs4669062   | T   | A   | 0.58     | 0.25      | 0.25      | 1 cell type            |               |                                | Pou5f1,Pou2f2, Oct-1                                                | 6                 | 358kb 5' of LOC400940 |
| 2                                                                                                                                       | 6491766         | rs6736276   | G   | T   | 0.71     | 0.39      | 0.72      | 1 cell type            | 1 cell type   |                                | TCFAP2E                                                             | 5                 | 363kb 5' of LOC400940 |
| 2                                                                                                                                       | 6491791         | rs6723293   | A   | C   | 0.6      | 0.25      | 0.25      | 1 cell type            | 1 cell type   |                                | MEF-2, MEF2A, NKX2-4                                                | 5                 | 363kb 5' of LOC400940 |
| 2                                                                                                                                       | 6492438         | rs6712182   | C   | A   | 0.69     | 0.38      | 0.7       | 1 cell type            | 1 cell type   | IRF4, SPI1, YY1, NFKB1, POLR2A | EWSR1-FLI1                                                          | 3a                | 364kb 5' of LOC400940 |
| 2                                                                                                                                       | 6492840         | rs12053330  | A   | T   | 0.68     | 0         | 0         | 1 cell type            |               |                                | LHX5, LMX1A, LMX1B, HOXB9, HOXB13, HOXD13, HOXD10, ELF3, MEF-2, SRF | 6                 | 364kb 5' of LOC400940 |
| 2                                                                                                                                       | 6493311         | rs10168857  | G   | C   | 0.7      | 0.38      | 0.7       | 1 cell type            | 34 cell types | CTCF,RAD21                     |                                                                     | 4                 | 365kb 5' of LOC400940 |
| 2                                                                                                                                       | 6494271         | rs11695864  | T   | C   | 0.58     | 0.17      | 0.23      | 1 cell type            |               | NFKB1                          |                                                                     | 5                 | 366kb 5' of LOC400940 |
| 2                                                                                                                                       | 6494504         | rs9287674   | C   | T   | 0.58     | 0.28      | 0.42      | 1 cell type            |               |                                | MAFB                                                                | 6                 | 366kb 5' of LOC400940 |
| 2                                                                                                                                       | 6494761         | rs9287675   | A   | G   | 0.69     | 0.38      | 0.7       | 1 cell type            |               |                                | HMGIIY                                                              | 6                 | 366kb 5' of LOC400940 |
| 2                                                                                                                                       | 6494923         | rs12052277  | T   | C   | 0.58     | 0.28      | 0.47      | 1 cell type            |               |                                |                                                                     | No Data           | 367kb 5' of LOC400940 |
| 2                                                                                                                                       | 6495748         | rs13394549  | G   | A   | 0.58     | 0.25      | 0.25      |                        |               |                                |                                                                     | No Data           | 367kb 5' of LOC400940 |
| 2                                                                                                                                       | 6497436         | rs10203671  | T   | G   | 0.69     | 0.38      | 0.59      |                        |               |                                |                                                                     | No Data           | 369kb 5' of LOC400940 |
| 2                                                                                                                                       | 6499442         | rs10171351  | G   | A   | 0.7      | 0.38      | 0.81      | 1 cell type            | 1 cell type   | MAFF                           | ATF5                                                                | 3a                | 370kb 3' of FLJ42418  |
| 2                                                                                                                                       | 6499447         | rs10171355  | G   | C   | 0.59     | 0.28      | 0.57      | 1 cell type            | 1 cell type   |                                |                                                                     | 5                 | 370kb 3' of FLJ42418  |
| 2                                                                                                                                       | 6500101         | rs13392835  | G   | A   | 0.6      | 0.28      | 0.61      |                        |               |                                | C-ETS-1                                                             | 6                 | 369kb 3' of FLJ42418  |
| 2                                                                                                                                       | 6500854         | rs6741398   | T   | C   | 0.7      | 0.38      | 0.86      |                        |               |                                |                                                                     | No Data           | 368kb 3' of FLJ42418  |
| 2                                                                                                                                       | 6502497         | rs10205734  | C   | A   | 0.59     | 0.28      | 0.57      | 1 cell type            |               |                                | COUPdirectrepeat1, NUR77, NR2F2, RARA, RXRA                         | 6                 | 367kb 3' of FLJ42418  |
| 2                                                                                                                                       | 6502729         | rs13426879  | C   | T   | 0.6      | 0.24      | 0.26      | 1 cell type            |               |                                | Pou3f3                                                              | 6                 | 367kb 3' of FLJ42418  |
| 2                                                                                                                                       | 6502949         | rs67611565  | T   | C   | 0.6      | 0.18      | 0.08      |                        |               |                                |                                                                     | No Data           | 366kb 3' of FLJ42418  |

|   |         |            |   |   |      |      |      |             |             |      |                                                    |         |                      |
|---|---------|------------|---|---|------|------|------|-------------|-------------|------|----------------------------------------------------|---------|----------------------|
| 2 | 6503032 | rs1037945  | T | C | 0.71 | 0.38 | 0.86 | 1 cell type | 1 cell type |      |                                                    | 5       | 366kb 3' of FLJ42418 |
| 2 | 6503318 | rs11694771 | C | T | 0.71 | 0.38 | 0.69 | 1 cell type | 1 cell type |      | IRF5                                               | 5       | 366kb 3' of FLJ42418 |
| 2 | 6503855 | rs11679546 | T | C | 0.71 | 0.38 | 0.86 | 1 cell type |             |      | SOX1                                               | 6       | 365kb 3' of FLJ42418 |
| 2 | 6504784 | rs7585700  | T | A | 0.71 | 0.38 | 0.69 |             |             |      | AR                                                 | 6       | 365kb 3' of FLJ42418 |
| 2 | 6505280 | rs7595350  | G | A | 0.71 | 0.38 | 0.84 |             |             |      | GM397                                              | 6       | 364kb 3' of FLJ42418 |
| 2 | 6505563 | rs7598285  | G | A | 0.71 | 0.38 | 0.82 |             |             |      | NR3C1, GR                                          | 6       | 364kb 3' of FLJ42418 |
| 2 | 6505849 | rs7586667  | A | T | 0.71 | 0.38 | 0.84 |             |             |      |                                                    | No Data | 363kb 3' of FLJ42418 |
| 2 | 6507825 | rs1462057  | A | T | 0.6  | 0.27 | 0.22 |             |             |      |                                                    | No Data | 361kb 3' of FLJ42418 |
| 2 | 6507834 | rs1993770  | A | G | 0.71 | 0.38 | 0.81 |             |             |      |                                                    | No Data | 361kb 3' of FLJ42418 |
| 2 | 6508180 | rs10183444 | G | A | 0.71 | 0.38 | 0.69 | 1 cell type |             |      | MTF-1                                              | 6       | 361kb 3' of FLJ42418 |
| 2 | 6509148 | rs1026613  | C | T | 0.7  | 0.38 | 0.72 | 2 cell type |             |      | NKX3-2                                             | 6       | 360kb 3' of FLJ42418 |
| 2 | 6510073 | rs1026612  | A | G | 0.7  | 0.38 | 0.86 |             |             |      | FOXP1, FOXJ2, FOXI1, Pou2f3, Pou2f2, OCT-1, Pou5f1 | 6       | 359kb 3' of FLJ42418 |
| 2 | 6510901 | rs2126373  | C | G | 0.7  | 0.33 | 0.7  | 2 cell type |             |      | AP-3                                               | 6       | 358kb 3' of FLJ42418 |
| 2 | 6519586 | rs13414747 | T | C | 0.59 | 0.23 | 0.23 |             |             |      | EVI-1                                              | 6       | 350kb 3' of FLJ42418 |
| 2 | 6520712 | rs7421408  | T | C | 0.6  | 0.23 | 0.23 |             |             |      |                                                    | No Data | 349kb 3' of FLJ42418 |
| 2 | 6520927 | rs12623572 | G | C | 0.59 | 0.23 | 0.23 |             |             |      |                                                    | No Data | 348kb 3' of FLJ42418 |
| 2 | 6520945 | rs12620492 | A | T | 0.59 | 0.23 | 0.23 |             |             |      | Pou6f1                                             | 6       | 348kb 3' of FLJ42418 |
| 2 | 6523994 | rs10208273 | A | G | 0.59 | 0.23 | 0.23 |             |             |      |                                                    | No Data | 345kb 3' of FLJ42418 |
| 2 | 6527776 | rs11692325 | T | C | 0.59 | 0.24 | 0.14 |             |             |      |                                                    | No Data | 342kb 3' of FLJ42418 |
| 2 | 6527937 | rs11686492 | C | A | 0.59 | 0.24 | 0.14 |             |             |      |                                                    | No Data | 341kb 3' of FLJ42418 |
| 2 | 6528496 | rs11692553 | A | T | 0.59 | 0.24 | 0.14 |             |             |      |                                                    | No Data | 341kb 3' of FLJ42418 |
| 2 | 6528955 | rs11693963 | A | G | 0.59 | 0.24 | 0.14 |             |             |      | AIRE                                               | 6       | 340kb 3' of FLJ42418 |
| 2 | 6529299 | rs67792751 | A | G | 0.59 | 0.23 | 0.14 |             |             |      | HSF2                                               | 6       | 340kb 3' of FLJ42418 |
| 2 | 6529635 | rs1564031  | G | A | 0.69 | 0.32 | 0.36 |             |             | MAFK |                                                    | 5       | 340kb 3' of FLJ42418 |
| 2 | 6530606 | rs4669064  | G | T | 0.69 | 0.32 | 0.32 |             |             |      | FAC1, OCT-1, Pou3f3                                | 6       | 339kb 3' of FLJ42418 |
| 2 | 6534175 | rs60481763 | A | T | 0.58 | 0.22 | 0.14 |             |             |      |                                                    | No Data | 335kb 3' of FLJ42418 |
| 2 | 6534815 | rs11681056 | T | C | 0.59 | 0.24 | 0.14 |             |             |      |                                                    | No Data | 334kb 3' of FLJ42418 |
| 2 | 6535716 | rs10180831 | A | G | 0.59 | 0.24 | 0.14 |             |             |      |                                                    | No Data | 334kb 3' of FLJ42418 |
| 2 | 6537123 | rs7590574  | A | G | 0.59 | 0.24 | 0.14 |             |             |      |                                                    | No Data | 332kb 3' of FLJ42418 |
| 2 | 6538963 | rs10210672 | C | T | 0.59 | 0.28 | 0.13 |             |             |      | EVI-1, GATA-1, GATA-2, GATA-3, GATA-6              | 6       | 330kb 3' of FLJ42418 |
| 2 | 6540702 | rs1564036  | G | A | 0.62 | 0.28 | 0.26 |             |             |      |                                                    | No Data | 329kb 3' of FLJ42418 |

Highlighted rows indicate the GWAS associated SNPs, all others are surrogates for these SNPs based on a  $r^2 > 0.6$  and within 500kb on either side of the index SNP in European ancestry individuals in 1000 Genome Project data

GERP cons. = Genomic evolutionary rate profiling score, sites under evolutionary constraint are indicated.

Lower RegulomeDB score indicates increased evidence of a regulatory function, scores specifically indicate: 3a = TF binding + any motif + DNase peak, 4 = TF binding + DNase peak, 5 = TF binding or DNase peak, 6 = motif hit.

Ref= reference allele; Alt = alternate allele; freq = reference allele frequency from 1000 Genomes Project data in European (CEU), East Asian (ASN), and West African (YRI) ancestry individuals.

Dnase HS = DNase hypersensitivity, potential evidence of open chromatin.

**Supplementary Table 4:** Association results for candidate genes from previous published literature

| Chr.  | Position <sup>a</sup> | dbSNP locus | Candidate Gene/region | Cytoband | Gene Neighborhood          | dbSNP Annotation    | Alleles <sup>b</sup> | MAF <sup>c</sup> | <i>P</i> | OR   | 95% CI |      |
|-------|-----------------------|-------------|-----------------------|----------|----------------------------|---------------------|----------------------|------------------|----------|------|--------|------|
| chr8  | 128349990             | rs11777807  | 8q24                  | 8q24.21  |                            |                     | C T                  | 0.429 0.488      | 4.60E-05 | 1.29 | 1.14   | 1.46 |
| chr8  | 144619949             | rs369051    | 8q24                  | 8q24.3   | ZC3H3                      | intron              | G A                  | 0.208 0.163      | 1.16E-04 | 0.73 | 0.62   | 0.86 |
| chr8  | 120287483             | rs9297594   | 8q24                  | 8q24.12  | MAL2                       |                     | C T                  | 0.441 0.499      | 2.24E-04 | 1.26 | 1.11   | 1.42 |
| chr8  | 125736407             | rs7813190   | 8q24                  | 8q24.13  | MTSS1                      | intron              | T C                  | 0.072 0.046      | 2.50E-04 | 0.59 | 0.45   | 0.79 |
| chr8  | 129601300             | rs10089519  | 8q24                  | 8q24.21  |                            |                     | G A                  | 0.333 0.387      | 3.87E-04 | 1.27 | 1.11   | 1.44 |
| chr8  | 130796533             | rs4517087   | 8q24                  | 8q24.21  |                            |                     | G A                  | 0.081 0.055      | 5.00E-04 | 0.62 | 0.47   | 0.81 |
| chr8  | 141032458             | rs2665917   | 8q24                  | 8q24.3   | TRAPPC9                    | intron              | C T                  | 0.477 0.426      | 7.98E-04 | 0.81 | 0.72   | 0.92 |
| chr8  | 128358102             | rs17378189  | 8q24                  | 8q24.21  | DQ515898,DQ515899,DQ515897 |                     | C T                  | 0.432 0.486      | 8.16E-04 | 1.24 | 1.09   | 1.41 |
| chr8  | 128668854             | rs4551307   | 8q24                  | 8q24.21  |                            |                     | A G                  | 0.165 0.207      | 8.22E-04 | 1.31 | 1.12   | 1.54 |
| chr8  | 142549792             | rs4907398   | 8q24                  | 8q24.3   | FLJ43860                   | intron              | A G                  | 0.042 0.062      | 8.30E-04 | 1.59 | 1.21   | 2.10 |
| chr8  | 128364892             | rs412835    | 8q24                  | 8q24.21  | DQ515898,DQ515899,DQ515897 |                     | A C                  | 0.420 0.373      | 8.50E-04 | 0.81 | 0.71   | 0.92 |
| chr8  | 128551824             | rs4871799   | 8q24                  | 8q24.21  | DQ515897                   |                     | A G                  | 0.231 0.189      | 8.53E-04 | 0.77 | 0.66   | 0.90 |
| chr8  | 142776025             | rs7844529   | 8q24                  | 8q24.3   |                            |                     | C T                  | 0.305 0.352      | 0.0011   | 1.24 | 1.09   | 1.42 |
| chr8  | 135038702             | rs1354365   | 8q24                  | 8q24.22  |                            |                     | G A                  | 0.385 0.432      | 0.0012   | 1.23 | 1.08   | 1.39 |
| chr8  | 128279002             | rs2466032   | 8q24                  | 8q24.21  | AK125310                   |                     | T C                  | 0.285 0.329      | 0.0012   | 1.24 | 1.09   | 1.41 |
| chr8  | 141012685             | rs2233230   | 8q24                  | 8q24.3   | TRAPPC9                    | intron              | T C                  | 0.480 0.433      | 0.0014   | 0.82 | 0.73   | 0.93 |
| chr8  | 140046652             | rs7817046   | 8q24                  | 8q24.3   |                            |                     | T G                  | 0.114 0.145      | 0.0018   | 1.33 | 1.11   | 1.58 |
| chr4  | 123993029             | rs308439    | FGF2                  | 4q27     | FGF2                       | intron              | T G                  | 0.038 0.057      | 0.0020   | 1.54 | 1.17   | 2.02 |
| chr8  | 120644365             | rs1058913   | 8q24                  | 8q24.12  | ENPP2                      | coding-synon        | C T                  | 0.254 0.212      | 0.0021   | 0.79 | 0.68   | 0.92 |
| chr8  | 128617860             | rs13258742  | 8q24                  | 8q24.21  |                            |                     | A G                  | 0.154 0.184      | 0.0022   | 1.28 | 1.09   | 1.50 |
| chr8  | 133408579             | rs13267466  | 8q24                  | 8q24.22  | KCNQ3                      | intron              | A C                  | 0.185 0.219      | 0.0022   | 1.26 | 1.09   | 1.46 |
| chr8  | 125519654             | rs10956183  | 8q24                  | 8q24.13  |                            |                     | G A                  | 0.074 0.100      | 0.0023   | 1.38 | 1.12   | 1.69 |
| chr8  | 141664205             | rs6985156   | 8q24                  | 8q24.3   | EIF2C2                     | intron              | G A                  | 0.107 0.134      | 0.0024   | 1.34 | 1.11   | 1.62 |
| chr8  | 140075791             | rs2318832   | 8q24                  | 8q24.3   |                            |                     | A C                  | 0.126 0.155      | 0.0024   | 1.30 | 1.10   | 1.54 |
| chr8  | 123910126             | rs12675789  | 8q24                  | 8q24.13  | ZHX2                       | intron              | G A                  | 0.387 0.423      | 0.0030   | 1.21 | 1.07   | 1.37 |
| chr8  | 140059109             | rs2135455   | 8q24                  | 8q24.3   |                            |                     | A C                  | 0.153 0.184      | 0.0034   | 1.27 | 1.08   | 1.49 |
| chr4  | 123995217             | rs308443    | FGF2                  | 4q27     | FGF2                       | intron              | G A                  | 0.027 0.042      | 0.0036   | 1.61 | 1.16   | 2.21 |
| chr8  | 139322987             | rs4243888   | 8q24                  | 8q24.23  | C8orfK32,FAM135B           | intron              | T C                  | 0.345 0.387      | 0.0036   | 1.20 | 1.06   | 1.36 |
| chr8  | 128526872             | rs7012462   | 8q24                  | 8q24.21  | DQ515897                   |                     | C T                  | 0.416 0.457      | 0.0036   | 1.20 | 1.06   | 1.36 |
| chr8  | 140747601             | rs1159873   | 8q24                  | 8q24.3   | KCNK9                      | intron              | G T                  | 0.200 0.236      | 0.0037   | 1.24 | 1.07   | 1.43 |
| chr8  | 141114914             | rs6578061   | 8q24                  | 8q24.3   | TRAPPC9                    | coding-synon,intron | A G                  | 0.431 0.471      | 0.0038   | 1.20 | 1.06   | 1.35 |
| chr12 | 46517697              | rs12721364  | VDR                   | 12q13.11 | VDR                        |                     | C T                  | 0.143 0.118      | 0.0039   | 0.76 | 0.63   | 0.92 |
| chr8  | 141140105             | rs9774091   | 8q24                  | 8q24.3   | TRAPPC9                    | intron              | C T                  | 0.037 0.053      | 0.0039   | 1.51 | 1.14   | 2.01 |
| chr8  | 139620994             | rs4909806   | 8q24                  | 8q24.23  |                            |                     | A C                  | 0.082 0.108      | 0.0041   | 1.34 | 1.10   | 1.64 |
| chr8  | 142343814             | rs1865246   | 8q24                  | 8q24.3   |                            |                     | T G                  | 0.325 0.290      | 0.0046   | 0.82 | 0.72   | 0.94 |

|       |           |            |          |         |                            |              |     |             |        |      |      |      |
|-------|-----------|------------|----------|---------|----------------------------|--------------|-----|-------------|--------|------|------|------|
| chr8  | 128373451 | rs6984900  | 8q24     | 8q24.21 | DQ515898,DQ515899,DQ515897 |              | T C | 0.183 0.151 | 0.0048 | 0.78 | 0.66 | 0.93 |
| chr8  | 117878286 | rs13279543 | 8q24     | 8q24.11 |                            |              | A G | 0.117 0.144 | 0.0049 | 1.29 | 1.08 | 1.54 |
| chr8  | 141140709 | rs11991065 | 8q24     | 8q24.3  | TRAPPC9                    | intron       | C T | 0.037 0.054 | 0.0049 | 1.52 | 1.13 | 2.04 |
| chr8  | 144589192 | rs11136295 | 8q24     | 8q24.3  | MAFA,ZC3H3                 |              | C T | 0.222 0.263 | 0.0050 | 1.23 | 1.06 | 1.42 |
| chr8  | 135977697 | rs7462577  | 8q24     | 8q24.22 |                            |              | G A | 0.266 0.304 | 0.0051 | 1.21 | 1.06 | 1.38 |
| chr8  | 128817680 | rs4645948  | 8q24     | 8q24.21 | BC042052,MYC               | UTR-5'       | C T | 0.019 0.035 | 0.0053 | 1.65 | 1.16 | 2.37 |
| chr8  | 133466309 | rs2673567  | 8q24     | 8q24.22 | KCNQ3                      | intron       | C A | 0.402 0.365 | 0.0053 | 0.84 | 0.74 | 0.95 |
| chr8  | 129115390 | rs2720685  | 8q24     | 8q24.21 | PVT1                       |              | C A | 0.419 0.380 | 0.0057 | 0.84 | 0.74 | 0.95 |
| chr8  | 138659506 | rs6996902  | 8q24     | 8q24.23 |                            |              | A G | 0.068 0.087 | 0.0058 | 1.39 | 1.10 | 1.75 |
| chr8  | 138283018 | rs16906838 | 8q24     | 8q24.23 |                            |              | C T | 0.053 0.067 | 0.0058 | 1.43 | 1.11 | 1.84 |
| chr8  | 130317775 | rs10808577 | 8q24     | 8q24.21 | CR593328,CR600271          | intron       | C T | 0.467 0.431 | 0.0059 | 0.84 | 0.74 | 0.95 |
| chr8  | 140962053 | rs7819785  | 8q24     | 8q24.3  | TRAPPC9                    | intron       | C A | 0.143 0.169 | 0.0059 | 1.26 | 1.07 | 1.49 |
| chr8  | 131418897 | rs6470816  | 8q24     | 8q24.21 | ASAP1,DDEF1                | intron       | T C | 0.469 0.507 | 0.0060 | 1.19 | 1.05 | 1.34 |
| chr8  | 141023395 | rs2665945  | 8q24     | 8q24.3  | TRAPPC9                    | intron       | C A | 0.289 0.325 | 0.0060 | 1.20 | 1.05 | 1.38 |
| chr8  | 132729668 | rs1420484  | 8q24     | 8q24.22 |                            |              | G A | 0.066 0.048 | 0.0061 | 0.68 | 0.51 | 0.90 |
| chr8  | 139290846 | rs11166797 | 8q24     | 8q24.23 | C8orfK32,FAM135B           | intron       | G A | 0.125 0.150 | 0.0067 | 1.27 | 1.07 | 1.51 |
| chr8  | 124509441 | rs10505435 | 8q24     | 8q24.13 | WDYHV1,C8orf32             | coding-synon | G A | 0.015 0.029 | 0.0069 | 1.74 | 1.16 | 2.62 |
| chr8  | 141653199 | rs7824304  | 8q24     | 8q24.3  | EIF2C2                     | intron       | C T | 0.354 0.316 | 0.0070 | 0.84 | 0.74 | 0.95 |
| chr20 | 2967957   | rs8125955  | GNRH2    | 20p13   | PTPRA,GNRH2,MPS26          |              | A C | 0.124 0.148 | 0.0071 | 1.27 | 1.07 | 1.51 |
| chr8  | 121678479 | rs7008488  | 8q24     | 8q24.12 | SNTB1                      | intron       | A G | 0.260 0.294 | 0.0071 | 1.20 | 1.05 | 1.38 |
| chr8  | 135074624 | rs1125719  | 8q24     | 8q24.22 |                            |              | A C | 0.440 0.479 | 0.0074 | 1.18 | 1.05 | 1.34 |
| chr8  | 141142984 | rs6578065  | 8q24     | 8q24.3  | TRAPPC9                    | intron       | C T | 0.082 0.104 | 0.0076 | 1.33 | 1.08 | 1.64 |
| chr8  | 137880501 | rs6995884  | 8q24     | 8q24.23 |                            |              | T C | 0.268 0.304 | 0.0077 | 1.20 | 1.05 | 1.36 |
| chr8  | 132191346 | rs4736741  | 8q24     | 8q24.22 |                            |              | C T | 0.045 0.034 | 0.0077 | 0.63 | 0.45 | 0.89 |
| chr8  | 136861443 | rs12056444 | 8q24     | 8q24.23 |                            |              | T C | 0.083 0.061 | 0.0077 | 0.71 | 0.56 | 0.92 |
| chr8  | 125669999 | rs4871506  | 8q24     | 8q24.13 | MTSS1                      | intron       | T G | 0.510 0.546 | 0.0080 | 1.18 | 1.04 | 1.33 |
| chr8  | 119148377 | rs2451157  | 8q24     | 8q24.11 | EXT1,AK025288              | intron       | A G | 0.163 0.195 | 0.0080 | 1.23 | 1.06 | 1.44 |
| chr8  | 121676475 | rs7827807  | 8q24     | 8q24.12 | SNTB1                      | intron       | C T | 0.178 0.210 | 0.0080 | 1.23 | 1.05 | 1.43 |
| chr8  | 135002169 | rs6999388  | 8q24     | 8q24.22 |                            |              | C T | 0.443 0.400 | 0.0080 | 0.85 | 0.75 | 0.96 |
| chr8  | 132233501 | rs10956576 | 8q24     | 8q24.22 |                            |              | C T | 0.141 0.169 | 0.0081 | 1.25 | 1.06 | 1.47 |
| chr8  | 140052179 | rs1876201  | 8q24     | 8q24.3  |                            |              | G A | 0.274 0.308 | 0.0084 | 1.19 | 1.05 | 1.36 |
| chr8  | 128298045 | rs10087719 | 8q24     | 8q24.21 | AK125310,BC106081          |              | A G | 0.256 0.288 | 0.0085 | 1.20 | 1.05 | 1.37 |
| chr8  | 136863761 | rs10464971 | 8q24     | 8q24.23 |                            |              | G A | 0.086 0.063 | 0.0086 | 0.71 | 0.56 | 0.92 |
| chr8  | 128280411 | rs2466035  | 8q24     | 8q24.21 | AK125310                   |              | T C | 0.313 0.356 | 0.0087 | 1.18 | 1.04 | 1.34 |
| chr8  | 134693776 | rs2978056  | 8q24     | 8q24.22 |                            |              | C T | 0.214 0.186 | 0.0092 | 0.82 | 0.70 | 0.95 |
| chr6  | 152460268 | rs3778099  | ESR1,FAS | 6q25.1  | ESR1,FAS/ER                | intron       | T C | 0.102 0.079 | 0.0092 | 0.74 | 0.59 | 0.93 |

|      |           |            |          |         |                                |              |     |             |        |      |      |      |
|------|-----------|------------|----------|---------|--------------------------------|--------------|-----|-------------|--------|------|------|------|
| chr8 | 119151258 | rs2255931  | 8q24     | 8q24.11 | EXT1,AK025288                  | intron       | A G | 0.230 0.263 | 0.0092 | 1.20 | 1.05 | 1.38 |
| chr8 | 141042792 | rs2665926  | 8q24     | 8q24.3  | TRAPPC9                        | intron       | C T | 0.453 0.416 | 0.0094 | 0.85 | 0.75 | 0.96 |
| chr8 | 135565242 | rs10103826 | 8q24     | 8q24.22 | ZFAT                           | intron       | C T | 0.170 0.139 | 0.0098 | 0.80 | 0.67 | 0.95 |
| chr8 | 139711509 | rs4301456  | 8q24     | 8q24.23 | COL22A1                        | intron       | C A | 0.050 0.034 | 0.0099 | 0.65 | 0.46 | 0.90 |
| chr8 | 140739149 | rs759656   | 8q24     | 8q24.3  | KCNK9                          | intron       | T C | 0.220 0.252 | 0.0100 | 1.20 | 1.04 | 1.38 |
| chr8 | 124862224 | rs2163534  | 8q24     | 8q24.13 | FAM91A1                        | intron       | T C | 0.398 0.438 | 0.0100 | 1.17 | 1.04 | 1.33 |
| chr8 | 133618581 | rs9297852  | 8q24     | 8q24.22 |                                |              | C A | 0.326 0.291 | 0.0104 | 0.84 | 0.73 | 0.96 |
| chr8 | 135076849 | rs6982411  | 8q24     | 8q24.22 |                                |              | T C | 0.437 0.476 | 0.0107 | 1.17 | 1.04 | 1.33 |
| chr8 | 141143846 | rs7005840  | 8q24     | 8q24.3  | TRAPPC9                        | intron       | A C | 0.099 0.122 | 0.0111 | 1.28 | 1.06 | 1.56 |
| chr8 | 117725962 | rs1347626  | 8q24     | 8q24.11 | EIF3H                          | near-gene-3' | C T | 0.111 0.135 | 0.0112 | 1.28 | 1.06 | 1.54 |
| chr8 | 133566309 | rs1901090  | 8q24     | 8q24.22 | KCNQ3                          |              | G A | 0.317 0.353 | 0.0112 | 1.18 | 1.04 | 1.34 |
| chr8 | 119160349 | rs9297575  | 8q24     | 8q24.11 | EXT1,AK025288                  | intron       | A C | 0.445 0.403 | 0.0114 | 0.86 | 0.76 | 0.97 |
| chr8 | 127722723 | rs11784545 | 8q24     | 8q24.21 |                                |              | C T | 0.077 0.055 | 0.0116 | 0.72 | 0.56 | 0.93 |
| chr8 | 125506992 | rs4620270  | 8q24     | 8q24.13 |                                |              | G T | 0.146 0.171 | 0.0117 | 1.23 | 1.05 | 1.45 |
| chr8 | 136049429 | rs6992707  | 8q24     | 8q24.22 |                                |              | A G | 0.245 0.271 | 0.0119 | 1.19 | 1.04 | 1.37 |
| chr8 | 138268410 | rs11780467 | 8q24     | 8q24.23 |                                |              | T C | 0.174 0.197 | 0.0120 | 1.22 | 1.04 | 1.42 |
| chr8 | 133609525 | rs1515509  | 8q24     | 8q24.22 |                                |              | A C | 0.276 0.241 | 0.0125 | 0.83 | 0.72 | 0.96 |
| chr8 | 130832019 | rs16904150 | 8q24     | 8q24.21 | GSDMC                          | intron       | C T | 0.041 0.054 | 0.0130 | 1.43 | 1.08 | 1.89 |
| chr8 | 130248160 | rs9643245  | 8q24     | 8q24.21 |                                |              | C T | 0.405 0.438 | 0.0132 | 1.17 | 1.03 | 1.33 |
| chr8 | 141656586 | rs9694342  | 8q24     | 8q24.3  | EIF2C2                         | intron       | C T | 0.359 0.324 | 0.0138 | 0.85 | 0.75 | 0.97 |
| chr8 | 138935678 | rs2326130  | 8q24     | 8q24.23 |                                |              | A G | 0.269 0.241 | 0.0139 | 0.84 | 0.72 | 0.96 |
| chr8 | 141155508 | rs7005952  | 8q24     | 8q24.3  | TRAPPC9                        | intron       | A G | 0.065 0.083 | 0.0141 | 1.33 | 1.06 | 1.67 |
| chr8 | 126285770 | rs7837996  | 8q24     | 8q24.13 | NSMCE2                         | intron       | G A | 0.061 0.075 | 0.0146 | 1.35 | 1.06 | 1.72 |
| chr8 | 136950018 | rs7818542  | 8q24     | 8q24.23 |                                |              | G A | 0.092 0.069 | 0.0146 | 0.75 | 0.59 | 0.94 |
| chr8 | 140831665 | rs11992718 | 8q24     | 8q24.3  | TRAPPC9                        | intron       | T C | 0.187 0.216 | 0.0146 | 1.21 | 1.04 | 1.40 |
| chr8 | 142348594 | rs6992286  | 8q24     | 8q24.3  |                                |              | G A | 0.331 0.368 | 0.0147 | 1.18 | 1.03 | 1.34 |
| chr8 | 132777104 | rs16904505 | 8q24     | 8q24.22 |                                |              | C T | 0.119 0.146 | 0.0149 | 1.24 | 1.04 | 1.48 |
| chr8 | 128544367 | rs921146   | 8q24     | 8q24.21 | DQ515897                       |              | A C | 0.204 0.175 | 0.0152 | 0.82 | 0.70 | 0.96 |
| chr8 | 121662368 | rs4871072  | 8q24     | 8q24.12 | SNTB1                          | intron       | A G | 0.252 0.283 | 0.0154 | 1.18 | 1.03 | 1.36 |
| chr8 | 124583364 | rs3739286  | 8q24     | 8q24.13 | AK023391,FBXO3<br>2            |              | G A | 0.240 0.210 | 0.0155 | 0.83 | 0.71 | 0.97 |
| chr8 | 124328612 | rs13261992 | 8q24     | 8q24.13 | C8orf76,ZHX1                   |              | A C | 0.046 0.031 | 0.0157 | 0.65 | 0.46 | 0.92 |
| chr8 | 128556704 | rs10086608 | 8q24     | 8q24.21 | DQ515897                       |              | G A | 0.107 0.082 | 0.0158 | 0.77 | 0.62 | 0.95 |
| chr8 | 120180592 | rs17179583 | 8q24     | 8q24.12 | COLEC10                        | intron       | T C | 0.120 0.148 | 0.0158 | 1.24 | 1.04 | 1.47 |
| chr8 | 128487118 | rs10505473 | 8q24     | 8q24.21 | DQ515898,DQ515<br>899,DQ515897 |              | G A | 0.150 0.177 | 0.0161 | 1.22 | 1.04 | 1.43 |
| chr8 | 132754845 | rs10092594 | 8q24     | 8q24.22 |                                |              | C T | 0.150 0.124 | 0.0162 | 0.80 | 0.66 | 0.96 |
| chr6 | 152349399 | rs2144025  | ESR1,FAS | 6q25.1  | ESR1,FAS/ER                    | intron       | C T | 0.136 0.110 | 0.0163 | 0.78 | 0.64 | 0.96 |
| chr8 | 125670131 | rs4871507  | 8q24     | 8q24.13 | MTSS1                          | intron       | T C | 0.382 0.348 | 0.0164 | 0.86 | 0.75 | 0.97 |
| chr8 | 125532431 | rs3812475  | 8q24     | 8q24.13 | TRMT12,CR93366<br>5            | missense     | C T | 0.502 0.538 | 0.0166 | 1.16 | 1.03 | 1.31 |
| chr8 | 141023141 | rs2665946  | 8q24     | 8q24.3  | TRAPPC9                        | intron       | A G | 0.289 0.320 | 0.0166 | 1.18 | 1.03 | 1.35 |



|      |           |            |      |         |                                                     |                                   |     |             |        |      |      |      |
|------|-----------|------------|------|---------|-----------------------------------------------------|-----------------------------------|-----|-------------|--------|------|------|------|
| chr8 | 133550519 | rs2673557  | 8q24 | 8q24.22 | KCNQ3                                               | intron                            | A G | 0.401 0.438 | 0.0169 | 1.16 | 1.03 | 1.31 |
| chr8 | 120249958 | rs6990281  | 8q24 | 8q24.12 |                                                     |                                   | C T | 0.160 0.187 | 0.0172 | 1.21 | 1.03 | 1.42 |
| chr8 | 118548028 | rs7015627  | 8q24 | 8q24.11 |                                                     |                                   | G A | 0.050 0.066 | 0.0178 | 1.38 | 1.06 | 1.80 |
| chr8 | 129875156 | rs1356761  | 8q24 | 8q24.21 |                                                     |                                   | C T | 0.265 0.293 | 0.0179 | 1.17 | 1.03 | 1.34 |
| chr8 | 144114501 | rs9692931  | 8q24 | 8q24.3  |                                                     |                                   | C T | 0.020 0.030 | 0.0180 | 1.58 | 1.08 | 2.32 |
| chr8 | 128074429 | rs1487232  | 8q24 | 8q24.21 |                                                     |                                   | C T | 0.065 0.047 | 0.0181 | 0.72 | 0.54 | 0.95 |
| chr8 | 128251633 | rs2456461  | 8q24 | 8q24.21 |                                                     |                                   | A G | 0.392 0.428 | 0.0181 | 1.16 | 1.03 | 1.31 |
| chr8 | 140795371 | rs199219   | 8q24 | 8q24.3  | TRAPPC9                                             |                                   | G A | 0.111 0.131 | 0.0183 | 1.26 | 1.04 | 1.52 |
| chr8 | 135992836 | rs10111298 | 8q24 | 8q24.22 |                                                     |                                   | C T | 0.211 0.180 | 0.0184 | 0.83 | 0.71 | 0.97 |
| chr8 | 144733496 | rs1062391  | 8q24 | 8q24.3  | GSDMD,pp14450,<br>C8orf73,NAPRT1,<br>EEF1D,BC034020 | coding-<br>synon,near-gene-<br>3' | T C | 0.363 0.392 | 0.0186 | 1.17 | 1.03 | 1.33 |
| chr8 | 122053249 | rs7828438  | 8q24 | 8q24.12 |                                                     |                                   | A G | 0.335 0.372 | 0.0186 | 1.17 | 1.03 | 1.33 |
| chr8 | 131199776 | rs10956511 | 8q24 | 8q24.21 | ASAP1                                               | intron                            | C T | 0.318 0.347 | 0.0187 | 1.17 | 1.03 | 1.34 |
| chr8 | 131538874 | rs868104   | 8q24 | 8q24.22 |                                                     |                                   | G A | 0.301 0.331 | 0.0191 | 1.18 | 1.03 | 1.34 |
| chr8 | 141089991 | rs6578056  | 8q24 | 8q24.3  | TRAPPC9                                             | intron                            | C T | 0.047 0.063 | 0.0193 | 1.36 | 1.05 | 1.75 |
| chr8 | 125049889 | rs17270769 | 8q24 | 8q24.13 | FER1L6,C8orf54                                      | intron                            | C T | 0.397 0.365 | 0.0193 | 0.86 | 0.76 | 0.98 |
| chr8 | 118121586 | rs7011057  | 8q24 | 8q24.11 | SLC30A8                                             |                                   | G A | 0.241 0.217 | 0.0195 | 0.84 | 0.72 | 0.97 |
| chr8 | 138654925 | rs7822502  | 8q24 | 8q24.23 |                                                     |                                   | G A | 0.150 0.169 | 0.0197 | 1.22 | 1.03 | 1.44 |
| chr8 | 129176227 | rs2648902  | 8q24 | 8q24.21 | PVT1                                                |                                   | G A | 0.287 0.256 | 0.0198 | 0.85 | 0.74 | 0.97 |
| chr8 | 126495568 | rs7822730  | 8q24 | 8q24.13 |                                                     |                                   | C T | 0.046 0.062 | 0.0199 | 1.38 | 1.05 | 1.81 |
| chr8 | 134574579 | rs1040339  | 8q24 | 8q24.22 | ST3GAL1                                             | intron                            | A G | 0.047 0.064 | 0.0199 | 1.37 | 1.05 | 1.79 |
| chr8 | 128819722 | rs4645959  | 8q24 | 8q24.21 | BC042052,MYC                                        | missense                          | A G | 0.043 0.028 | 0.0199 | 0.66 | 0.46 | 0.94 |
| chr8 | 122399652 | rs13267240 | 8q24 | 8q24.12 |                                                     |                                   | C T | 0.227 0.195 | 0.0201 | 0.84 | 0.72 | 0.97 |
| chr8 | 121685550 | rs7017780  | 8q24 | 8q24.12 | SNTB1                                               | intron                            | G A | 0.198 0.226 | 0.0202 | 1.19 | 1.03 | 1.38 |
| chr8 | 132074392 | rs6988204  | 8q24 | 8q24.22 | ADCY8                                               | intron                            | C A | 0.444 0.411 | 0.0202 | 0.86 | 0.76 | 0.98 |
| chr8 | 128257201 | rs2466024  | 8q24 | 8q24.21 |                                                     |                                   | G A | 0.390 0.424 | 0.0204 | 1.16 | 1.02 | 1.31 |
| chr8 | 140917074 | rs876745   | 8q24 | 8q24.3  | TRAPPC9                                             | intron                            | A G | 0.235 0.264 | 0.0212 | 1.18 | 1.02 | 1.35 |
| chr8 | 142371442 | rs919873   | 8q24 | 8q24.3  |                                                     |                                   | C T | 0.077 0.093 | 0.0212 | 1.28 | 1.04 | 1.59 |
| chr8 | 134690044 | rs16904960 | 8q24 | 8q24.22 |                                                     |                                   | G A | 0.190 0.169 | 0.0213 | 0.83 | 0.71 | 0.97 |
| chr8 | 145484561 | rs4977203  | 8q24 | 8q24.3  | BOP1,HSF1                                           | intron,near-gene-<br>5'           | C T | 0.493 0.530 | 0.0214 | 1.15 | 1.02 | 1.31 |
| chr8 | 141279396 | rs13259162 | 8q24 | 8q24.3  | TRAPPC9                                             | intron                            | G A | 0.344 0.375 | 0.0220 | 1.16 | 1.02 | 1.31 |
| chr8 | 125675249 | rs4871510  | 8q24 | 8q24.13 | MTSS1                                               | intron                            | G A | 0.467 0.499 | 0.0221 | 1.15 | 1.02 | 1.30 |
| chr8 | 133950426 | rs180204   | 8q24 | 8q24.22 | TG                                                  | intron                            | C T | 0.237 0.266 | 0.0223 | 1.17 | 1.02 | 1.35 |
| chr8 | 141691719 | rs2176397  | 8q24 | 8q24.3  | EIF2C2                                              | intron                            | C T | 0.285 0.311 | 0.0224 | 1.17 | 1.02 | 1.34 |
| chr8 | 121143409 | rs6998748  | 8q24 | 8q24.12 | DEPDC6                                              |                                   | T C | 0.020 0.030 | 0.0227 | 1.57 | 1.06 | 2.31 |
| chr8 | 128595167 | rs7004374  | 8q24 | 8q24.21 |                                                     |                                   | T C | 0.362 0.394 | 0.0231 | 1.16 | 1.02 | 1.32 |
| chr8 | 133485738 | rs2673562  | 8q24 | 8q24.22 | KCNQ3                                               | intron                            | A C | 0.343 0.313 | 0.0231 | 0.86 | 0.76 | 0.98 |
| chr8 | 138935273 | rs4909709  | 8q24 | 8q24.23 |                                                     |                                   | T C | 0.486 0.513 | 0.0232 | 1.16 | 1.02 | 1.31 |
| chr8 | 124733294 | rs11784175 | 8q24 | 8q24.13 | KLHL38                                              | missense                          | T A | 0.136 0.159 | 0.0232 | 1.22 | 1.03 | 1.45 |

|      |           |            |      |         |                        |              |     |             |        |      |      |      |
|------|-----------|------------|------|---------|------------------------|--------------|-----|-------------|--------|------|------|------|
| chr8 | 122053539 | rs17196271 | 8q24 | 8q24.12 |                        |              | C T | 0.424 0.458 | 0.0235 | 1.16 | 1.02 | 1.32 |
| chr8 | 131094216 | rs2060983  | 8q24 | 8q24.21 | FAM49B                 |              | G A | 0.414 0.444 | 0.0237 | 1.15 | 1.02 | 1.30 |
| chr8 | 134631796 | rs16904945 | 8q24 | 8q24.22 | ST3GAL1                | intron       | T C | 0.018 0.027 | 0.0240 | 1.60 | 1.06 | 2.42 |
| chr8 | 141332197 | rs11166965 | 8q24 | 8q24.3  | TRAPPC9                | coding-synon | G A | 0.124 0.104 | 0.0242 | 0.79 | 0.65 | 0.97 |
| chr8 | 138944681 | rs907461   | 8q24 | 8q24.23 |                        |              | T C | 0.488 0.514 | 0.0246 | 1.15 | 1.02 | 1.31 |
| chr8 | 138252044 | rs10088280 | 8q24 | 8q24.23 |                        |              | T C | 0.040 0.053 | 0.0249 | 1.40 | 1.04 | 1.87 |
| chr8 | 123961250 | rs4871320  | 8q24 | 8q24.13 | ZHX2                   | intron       | A G | 0.295 0.267 | 0.0251 | 0.85 | 0.74 | 0.98 |
| chr8 | 141620589 | rs2293939  | 8q24 | 8q24.3  | EIF2C2                 | coding-synon | G A | 0.269 0.242 | 0.0253 | 0.85 | 0.73 | 0.98 |
| chr8 | 142753965 | rs13248484 | 8q24 | 8q24.3  |                        |              | A G | 0.225 0.259 | 0.0254 | 1.18 | 1.02 | 1.37 |
| chr8 | 127956742 | rs756099   | 8q24 | 8q24.21 |                        |              | A G | 0.300 0.270 | 0.0254 | 0.86 | 0.75 | 0.98 |
| chr8 | 130751569 | rs13267039 | 8q24 | 8q24.21 |                        |              | T C | 0.103 0.083 | 0.0256 | 0.77 | 0.62 | 0.97 |
| chr8 | 128658004 | rs7824074  | 8q24 | 8q24.21 |                        |              | G T | 0.286 0.256 | 0.0256 | 0.86 | 0.75 | 0.98 |
| chr8 | 139852320 | rs1320270  | 8q24 | 8q24.23 | COL22A1                | intron       | A G | 0.379 0.349 | 0.0257 | 0.86 | 0.76 | 0.98 |
| chr8 | 137419638 | rs4909593  | 8q24 | 8q24.23 |                        |              | T C | 0.245 0.278 | 0.0260 | 1.17 | 1.02 | 1.35 |
| chr8 | 127651009 | rs7012323  | 8q24 | 8q24.21 |                        |              | T C | 0.264 0.233 | 0.0261 | 0.85 | 0.74 | 0.98 |
| chr8 | 137630686 | rs305262   | 8q24 | 8q24.23 |                        |              | G A | 0.262 0.227 | 0.0262 | 0.84 | 0.73 | 0.98 |
| chr8 | 143046590 | rs1542758  | 8q24 | 8q24.3  |                        |              | A G | 0.088 0.108 | 0.0262 | 1.26 | 1.03 | 1.54 |
| chr8 | 120748439 | rs10505371 | 8q24 | 8q24.12 |                        |              | C T | 0.134 0.111 | 0.0263 | 0.81 | 0.67 | 0.98 |
| chr8 | 144406670 | rs2272631  | 8q24 | 8q24.3  | ZFP41                  | intron       | G A | 0.208 0.233 | 0.0267 | 1.18 | 1.02 | 1.36 |
| chr8 | 142392371 | rs7818687  | 8q24 | 8q24.3  |                        |              | T C | 0.042 0.051 | 0.0268 | 1.37 | 1.04 | 1.81 |
| chr8 | 143124877 | rs6993344  | 8q24 | 8q24.3  |                        |              | C T | 0.440 0.474 | 0.0268 | 1.15 | 1.02 | 1.30 |
| chr8 | 141049638 | rs10875447 | 8q24 | 8q24.3  | TRAPPC9                | intron       | C T | 0.307 0.339 | 0.0273 | 1.16 | 1.02 | 1.33 |
| chr8 | 141219100 | rs7006969  | 8q24 | 8q24.3  | TRAPPC9                | intron       | C A | 0.419 0.454 | 0.0273 | 1.14 | 1.02 | 1.29 |
| chr8 | 119264092 | rs2514734  | 8q24 | 8q24.12 | SAMD12                 |              | T G | 0.338 0.369 | 0.0274 | 1.15 | 1.02 | 1.31 |
| chr8 | 135575225 | rs4424215  | 8q24 | 8q24.22 | ZFAT                   | intron       | T C | 0.323 0.291 | 0.0276 | 0.86 | 0.75 | 0.98 |
| chr8 | 135821817 | rs13272667 | 8q24 | 8q24.22 |                        |              | C A | 0.109 0.132 | 0.0276 | 1.23 | 1.02 | 1.47 |
| chr8 | 134678592 | rs7830798  | 8q24 | 8q24.22 |                        |              | A G | 0.205 0.233 | 0.0277 | 1.18 | 1.02 | 1.36 |
| chr8 | 120415891 | rs2447186  | 8q24 | 8q24.12 |                        |              | A G | 0.198 0.228 | 0.0281 | 1.19 | 1.02 | 1.39 |
| chr8 | 120176806 | rs13254750 | 8q24 | 8q24.12 | COLEC10                | intron       | G A | 0.113 0.137 | 0.0282 | 1.22 | 1.02 | 1.46 |
| chr8 | 134156632 | rs4301434  | 8q24 | 8q24.22 | TG,SLA,SLAP            | intron       | A G | 0.463 0.435 | 0.0284 | 0.87 | 0.77 | 0.99 |
| chr8 | 130473112 | rs16904064 | 8q24 | 8q24.21 |                        |              | T G | 0.299 0.323 | 0.0291 | 1.16 | 1.02 | 1.33 |
| chr8 | 135857073 | rs7832498  | 8q24 | 8q24.22 |                        |              | C T | 0.041 0.028 | 0.0291 | 0.68 | 0.48 | 0.96 |
| chr8 | 125555948 | rs3812472  | 8q24 | 8q24.13 | CR933665,RNF139,TATDN1 | near-gene-5' | C T | 0.512 0.543 | 0.0294 | 1.15 | 1.01 | 1.30 |
| chr8 | 141046387 | rs2665931  | 8q24 | 8q24.3  | TRAPPC9                | intron       | T C | 0.218 0.243 | 0.0295 | 1.17 | 1.02 | 1.35 |
| chr8 | 127028456 | rs1602511  | 8q24 | 8q24.13 | BX648371               | intron       | C T | 0.171 0.203 | 0.0298 | 1.18 | 1.02 | 1.38 |
| chr8 | 125567728 | rs3812471  | 8q24 | 8q24.13 | RNF139,TATDN1          | coding-synon | A G | 0.511 0.541 | 0.0301 | 1.15 | 1.01 | 1.29 |
| chr8 | 134690286 | rs6471136  | 8q24 | 8q24.22 |                        |              | G A | 0.206 0.233 | 0.0303 | 1.17 | 1.02 | 1.36 |
| chr8 | 134422814 | rs6986484  | 8q24 | 8q24.22 |                        |              | C A | 0.012 0.019 | 0.0303 | 1.67 | 1.05 | 2.68 |
| chr8 | 143055893 | rs12676273 | 8q24 | 8q24.3  |                        |              | A G | 0.088 0.106 | 0.0306 | 1.25 | 1.02 | 1.53 |
| chr8 | 130523219 | rs13269801 | 8q24 | 8q24.21 |                        | intron       | G A | 0.319 0.341 | 0.0307 | 1.15 | 1.01 | 1.32 |

|      |           |            |        |         |                         |                         |     |             |        |      |      |      |
|------|-----------|------------|--------|---------|-------------------------|-------------------------|-----|-------------|--------|------|------|------|
| chr8 | 139142000 | rs10101858 | 8q24   | 8q24.23 |                         |                         | A G | 0.264 0.292 | 0.0309 | 1.16 | 1.01 | 1.32 |
| chr8 | 129587463 | rs1516980  | 8q24   | 8q24.21 |                         |                         | A C | 0.274 0.303 | 0.0310 | 1.16 | 1.01 | 1.32 |
| chr8 | 119277028 | rs2514981  | 8q24   | 8q24.12 | SAMD12                  | UTR-3'                  | T C | 0.344 0.375 | 0.0310 | 1.15 | 1.01 | 1.30 |
| chr8 | 128656181 | rs7814563  | 8q24   | 8q24.21 |                         |                         | C T | 0.477 0.509 | 0.0313 | 1.15 | 1.01 | 1.30 |
| chr4 | 124007945 | rs7694627  | FGF2   | 4q28.1  | FGF2                    | intron                  | T C | 0.174 0.155 | 0.0315 | 0.83 | 0.70 | 0.98 |
| chr8 | 133599217 | rs2138248  | 8q24   | 8q24.22 |                         |                         | T G | 0.344 0.313 | 0.0318 | 0.87 | 0.76 | 0.99 |
| chr8 | 132080461 | rs9297816  | 8q24   | 8q24.22 | ADCY8                   | intron                  | G A | 0.376 0.342 | 0.0319 | 0.87 | 0.77 | 0.99 |
| chr8 | 136937704 | rs4909528  | 8q24   | 8q24.23 |                         |                         | C T | 0.047 0.058 | 0.0320 | 1.34 | 1.02 | 1.75 |
| chr8 | 118212924 | rs6469674  | 8q24   | 8q24.11 | SLC30A8                 |                         | A G | 0.050 0.039 | 0.0321 | 0.71 | 0.52 | 0.97 |
| chr8 | 126242064 | rs6992545  | 8q24   | 8q24.13 | NSMCE2                  | intron                  | C T | 0.061 0.075 | 0.0322 | 1.29 | 1.02 | 1.63 |
| chr8 | 141652078 | rs13276958 | 8q24   | 8q24.3  | EIF2C2                  | intron                  | T C | 0.461 0.428 | 0.0322 | 0.88 | 0.78 | 0.99 |
| chr8 | 123896230 | rs16897499 | 8q24   | 8q24.13 | ZHX2                    | intron                  | G A | 0.120 0.099 | 0.0326 | 0.80 | 0.65 | 0.98 |
| chr8 | 122040220 | rs7824584  | 8q24   | 8q24.12 |                         |                         | C T | 0.459 0.425 | 0.0327 | 0.87 | 0.77 | 0.99 |
| chr8 | 136592679 | rs10104847 | 8q24   | 8q24.23 | KHDRBS3                 | intron                  | T C | 0.040 0.053 | 0.0328 | 1.37 | 1.03 | 1.82 |
| chr8 | 144415762 | rs3750213  | 8q24   | 8q24.3  | ZFP41,GLI4              | UTR-3'                  | G A | 0.163 0.186 | 0.0331 | 1.19 | 1.01 | 1.40 |
| chr8 | 134707440 | rs3958181  | 8q24   | 8q24.22 |                         |                         | C A | 0.252 0.273 | 0.0332 | 1.16 | 1.01 | 1.33 |
| chr8 | 136087112 | rs7462529  | 8q24   | 8q24.22 |                         |                         | T C | 0.299 0.321 | 0.0336 | 1.15 | 1.01 | 1.31 |
| chr8 | 129957976 | rs7845615  | 8q24   | 8q24.21 |                         |                         | T C | 0.298 0.327 | 0.0337 | 1.15 | 1.01 | 1.31 |
| chr9 | 100915610 | rs10739778 | TGFBR1 | 9q22.33 | TGFBR1                  | intron                  | A C | 0.341 0.310 | 0.0339 | 0.87 | 0.76 | 0.99 |
| chr8 | 124585035 | rs4870855  | 8q24   | 8q24.13 | AK023391,FBXO3<br>2     | intron                  | G A | 0.082 0.065 | 0.0339 | 0.77 | 0.60 | 0.98 |
| chr8 | 133465357 | rs1457785  | 8q24   | 8q24.22 | KCNQ3                   | intron                  | C T | 0.343 0.316 | 0.0340 | 0.87 | 0.76 | 0.99 |
| chr8 | 117791736 | rs7846316  | 8q24   | 8q24.11 | EIF3H                   | intron                  | T G | 0.096 0.113 | 0.0340 | 1.24 | 1.02 | 1.51 |
| chr8 | 125621457 | rs7007115  | 8q24   | 8q24.13 | TATDN1,NDUFB9,<br>MTSS1 | intron,near-gene-<br>5' | T C | 0.490 0.460 | 0.0340 | 0.87 | 0.77 | 0.99 |
| chr8 | 120667532 | rs7341607  | 8q24   | 8q24.12 | ENPP2                   | intron                  | G A | 0.011 0.006 | 0.0340 | 0.46 | 0.22 | 0.96 |
| chr8 | 138974478 | rs9657451  | 8q24   | 8q24.23 |                         |                         | G A | 0.144 0.123 | 0.0341 | 0.82 | 0.68 | 0.99 |
| chr8 | 140402258 | rs994769   | 8q24   | 8q24.3  |                         |                         | A G | 0.163 0.189 | 0.0341 | 1.19 | 1.01 | 1.40 |
| chr8 | 130251064 | rs7823113  | 8q24   | 8q24.21 |                         |                         | A G | 0.434 0.464 | 0.0347 | 1.14 | 1.01 | 1.29 |
| chr8 | 133177833 | rs2469608  | 8q24   | 8q24.22 |                         |                         | C T | 0.292 0.263 | 0.0350 | 0.86 | 0.75 | 0.99 |
| chr8 | 135842789 | rs7842889  | 8q24   | 8q24.22 |                         |                         | G A | 0.271 0.300 | 0.0351 | 1.15 | 1.01 | 1.32 |
| chr8 | 140300952 | rs11775898 | 8q24   | 8q24.3  |                         |                         | T C | 0.479 0.509 | 0.0352 | 1.14 | 1.01 | 1.28 |
| chr8 | 130748358 | rs6985166  | 8q24   | 8q24.21 |                         |                         | A G | 0.321 0.289 | 0.0355 | 0.87 | 0.76 | 0.99 |
| chr8 | 120445970 | rs2326244  | 8q24   | 8q24.12 |                         |                         | A G | 0.235 0.264 | 0.0358 | 1.16 | 1.01 | 1.34 |
| chr8 | 143478576 | rs6583623  | 8q24   | 8q24.3  | TSNARE1                 | intron                  | G A | 0.183 0.155 | 0.0358 | 0.84 | 0.72 | 0.99 |
| chr8 | 126741495 | rs729005   | 8q24   | 8q24.13 |                         |                         | T C | 0.075 0.061 | 0.0358 | 0.77 | 0.60 | 0.98 |
| chr8 | 135024658 | rs12677718 | 8q24   | 8q24.22 |                         |                         | C T | 0.256 0.230 | 0.0359 | 0.86 | 0.74 | 0.99 |
| chr8 | 141025287 | rs2614754  | 8q24   | 8q24.3  | TRAPPC9                 | intron                  | T C | 0.091 0.109 | 0.0360 | 1.25 | 1.01 | 1.53 |
| chr8 | 126419388 | rs7820471  | 8q24   | 8q24.13 | NSMCE2                  | intron                  | T C | 0.217 0.245 | 0.0361 | 1.17 | 1.01 | 1.34 |
| chr8 | 141163986 | rs13282606 | 8q24   | 8q24.3  | TRAPPC9,AX7482<br>39    | intron                  | C T | 0.471 0.446 | 0.0362 | 0.87 | 0.77 | 0.99 |
| chr8 | 129100916 | rs2033098  | 8q24   | 8q24.21 | PVT1                    |                         | T C | 0.406 0.437 | 0.0363 | 1.14 | 1.01 | 1.28 |

|      |           |            |      |         |                                             |              |     |             |        |      |      |      |
|------|-----------|------------|------|---------|---------------------------------------------|--------------|-----|-------------|--------|------|------|------|
| chr8 | 121995306 | rs10110670 | 8q24 | 8q24.12 |                                             |              | G A | 0.390 0.358 | 0.0366 | 0.87 | 0.77 | 0.99 |
| chr8 | 142752379 | rs12547611 | 8q24 | 8q24.3  |                                             |              | G A | 0.201 0.232 | 0.0367 | 1.18 | 1.01 | 1.37 |
| chr8 | 125531302 | rs4132855  | 8q24 | 8q24.13 | TRMT12,CR933665                             | near-gene-5' | T C | 0.415 0.385 | 0.0367 | 0.87 | 0.77 | 0.99 |
| chr8 | 144554846 | rs4336628  | 8q24 | 8q24.3  | RHPN1                                       |              | C T | 0.356 0.327 | 0.0367 | 0.87 | 0.77 | 0.99 |
| chr8 | 132940790 | rs11997238 | 8q24 | 8q24.22 |                                             |              | A G | 0.073 0.089 | 0.0370 | 1.27 | 1.01 | 1.59 |
| chr8 | 125548844 | rs4128468  | 8q24 | 8q24.13 | TRMT12,CR933665,RNF139                      |              | C T | 0.483 0.454 | 0.0372 | 0.88 | 0.78 | 0.99 |
| chr8 | 137623388 | rs2660666  | 8q24 | 8q24.23 |                                             |              | G A | 0.260 0.227 | 0.0372 | 0.85 | 0.74 | 0.99 |
| chr8 | 133474641 | rs2597356  | 8q24 | 8q24.22 | KCNQ3                                       | intron       | G A | 0.371 0.401 | 0.0374 | 1.14 | 1.01 | 1.29 |
| chr8 | 139925468 | rs4736293  | 8q24 | 8q24.23 | COL22A1                                     | intron       | A G | 0.040 0.030 | 0.0375 | 0.69 | 0.48 | 0.98 |
| chr8 | 124849428 | rs11987639 | 8q24 | 8q24.13 | FAM91A1                                     | near-gene-5' | C T | 0.050 0.038 | 0.0378 | 0.72 | 0.52 | 0.98 |
| chr8 | 119236783 | rs7005426  | 8q24 | 8q24.12 |                                             |              | G T | 0.260 0.288 | 0.0380 | 1.15 | 1.01 | 1.32 |
| chr8 | 128412048 | rs17464492 | 8q24 | 8q24.21 | DQ515898,DQ515899,DQ515897                  |              | A G | 0.278 0.244 | 0.0381 | 0.86 | 0.75 | 0.99 |
| chr8 | 125823030 | rs1367500  | 8q24 | 8q24.13 |                                             |              | A G | 0.375 0.406 | 0.0381 | 1.14 | 1.01 | 1.30 |
| chr8 | 128614565 | rs6991990  | 8q24 | 8q24.21 |                                             |              | C T | 0.351 0.378 | 0.0382 | 1.14 | 1.01 | 1.30 |
| chr8 | 141332051 | rs11166964 | 8q24 | 8q24.3  | TRAPPC9                                     | intron       | C T | 0.122 0.104 | 0.0382 | 0.81 | 0.67 | 0.99 |
| chr8 | 141025315 | rs6995955  | 8q24 | 8q24.3  | TRAPPC9                                     | intron       | A G | 0.392 0.421 | 0.0382 | 1.14 | 1.01 | 1.29 |
| chr8 | 118145296 | rs1505521  | 8q24 | 8q24.11 | SLC30A8                                     |              | C T | 0.049 0.037 | 0.0383 | 0.71 | 0.51 | 0.98 |
| chr8 | 144734218 | rs1809148  | 8q24 | 8q24.3  | GSDMD,pp14450,C8orf73,NAPRT1,EEF1D,BC034020 | intron       | C T | 0.124 0.144 | 0.0384 | 1.20 | 1.01 | 1.43 |
| chr8 | 137310055 | rs16905528 | 8q24 | 8q24.23 |                                             |              | T C | 0.087 0.075 | 0.0384 | 0.79 | 0.62 | 0.99 |
| chr8 | 142613592 | rs2085841  | 8q24 | 8q24.3  |                                             |              | G A | 0.325 0.349 | 0.0385 | 1.15 | 1.01 | 1.30 |
| chr8 | 125040636 | rs11993947 | 8q24 | 8q24.13 | FER1L6                                      | intron       | T G | 0.407 0.378 | 0.0385 | 0.88 | 0.77 | 0.99 |
| chr8 | 138933278 | rs7386095  | 8q24 | 8q24.23 |                                             |              | C T | 0.487 0.514 | 0.0386 | 1.14 | 1.01 | 1.29 |
| chr8 | 120469713 | rs34112166 | 8q24 | 8q24.12 |                                             |              | G A | 0.239 0.213 | 0.0387 | 0.85 | 0.73 | 0.99 |
| chr6 | 152066678 | rs851982   | ESR1 | 6q25.1  | ESR1                                        |              | T C | 0.409 0.377 | 0.0389 | 0.88 | 0.77 | 0.99 |
| chr8 | 143343792 | rs12547214 | 8q24 | 8q24.3  | TSNARE1                                     | intron       | G A | 0.332 0.367 | 0.0392 | 1.15 | 1.01 | 1.31 |
| chr8 | 142559302 | rs2748416  | 8q24 | 8q24.3  | FLJ43860                                    | missense     | A C | 0.087 0.104 | 0.0393 | 1.24 | 1.01 | 1.52 |
| chr8 | 130771993 | rs16904143 | 8q24 | 8q24.21 |                                             |              | G A | 0.141 0.161 | 0.0397 | 1.19 | 1.01 | 1.40 |
| chr8 | 119277119 | rs2514742  | 8q24 | 8q24.12 | SAMD12                                      | UTR-3'       | T G | 0.344 0.374 | 0.0398 | 1.14 | 1.01 | 1.29 |
| chr8 | 142602117 | rs4907333  | 8q24 | 8q24.3  |                                             |              | A G | 0.121 0.143 | 0.0399 | 1.20 | 1.01 | 1.43 |
| chr8 | 134696938 | rs13264573 | 8q24 | 8q24.22 |                                             |              | T G | 0.503 0.480 | 0.0402 | 0.88 | 0.78 | 0.99 |
| chr8 | 132213583 | rs13270165 | 8q24 | 8q24.22 |                                             |              | C T | 0.447 0.414 | 0.0406 | 0.88 | 0.78 | 0.99 |
| chr8 | 117886437 | rs4876683  | 8q24 | 8q24.11 |                                             |              | C T | 0.585 0.554 | 0.0414 | 0.88 | 0.78 | 1.00 |
| chr8 | 140994948 | rs12548239 | 8q24 | 8q24.3  | TRAPPC9                                     | intron       | C A | 0.094 0.111 | 0.0415 | 1.23 | 1.01 | 1.50 |

|       |           |            |        |         |                                                     |                               |     |             |        |      |      |      |
|-------|-----------|------------|--------|---------|-----------------------------------------------------|-------------------------------|-----|-------------|--------|------|------|------|
| chr8  | 144732707 | rs4874156  | 8q24   | 8q24.3  | GSDMD,pp14450,<br>C8orf73,NAPRT1,<br>EEF1D,BC034020 | near-gene-<br>3',near-gene-5' | G A | 0.083 0.099 | 0.0417 | 1.24 | 1.01 | 1.54 |
| chr8  | 131373060 | rs16904239 | 8q24   | 8q24.21 | ASAP1,DDEF1,DD<br>EF1IT1                            | intron                        | G A | 0.211 0.237 | 0.0418 | 1.17 | 1.01 | 1.36 |
| chr8  | 141618473 | rs2977469  | 8q24   | 8q24.3  | EIF2C2                                              | intron                        | A G | 0.465 0.439 | 0.0418 | 0.88 | 0.78 | 1.00 |
| chr8  | 140943869 | rs729855   | 8q24   | 8q24.3  | TRAPPC9                                             | intron                        | G A | 0.115 0.133 | 0.0420 | 1.21 | 1.01 | 1.45 |
| chr8  | 137871996 | rs3850500  | 8q24   | 8q24.23 |                                                     |                               | G A | 0.278 0.305 | 0.0422 | 1.14 | 1.00 | 1.30 |
| chr8  | 135314442 | rs7012883  | 8q24   | 8q24.22 |                                                     |                               | T C | 0.073 0.058 | 0.0427 | 0.77 | 0.60 | 0.99 |
| chr8  | 135091149 | rs13267601 | 8q24   | 8q24.22 |                                                     |                               | G A | 0.207 0.184 | 0.0428 | 0.85 | 0.73 | 1.00 |
| chr8  | 145485228 | rs11998675 | 8q24   | 8q24.3  | BOP1,HSF1                                           | intron,near-gene-<br>5'       | A C | 0.496 0.530 | 0.0430 | 1.14 | 1.00 | 1.29 |
| chr8  | 142718373 | rs7835431  | 8q24   | 8q24.3  |                                                     |                               | C T | 0.055 0.068 | 0.0431 | 1.29 | 1.01 | 1.66 |
| chr8  | 141033298 | rs2665919  | 8q24   | 8q24.3  | TRAPPC9                                             | intron                        | C A | 0.092 0.109 | 0.0437 | 1.23 | 1.01 | 1.50 |
| chr8  | 118306187 | rs10505309 | 8q24   | 8q24.11 |                                                     |                               | T C | 0.082 0.067 | 0.0438 | 0.78 | 0.61 | 0.99 |
| chr8  | 140730467 | rs2545457  | 8q24   | 8q24.3  | KCNK9                                               | intron                        | T C | 0.387 0.415 | 0.0439 | 1.14 | 1.00 | 1.29 |
| chr8  | 134392519 | rs4736648  | 8q24   | 8q24.22 |                                                     |                               | T C | 0.372 0.338 | 0.0439 | 0.88 | 0.77 | 1.00 |
| chr8  | 140490297 | rs10435688 | 8q24   | 8q24.3  |                                                     |                               | C T | 0.229 0.251 | 0.0440 | 1.16 | 1.00 | 1.33 |
| chr8  | 142260214 | rs2278448  | 8q24   | 8q24.3  | DENND3,KIAA087<br>0                                 | intron                        | A C | 0.378 0.348 | 0.0441 | 0.87 | 0.77 | 1.00 |
| chr8  | 129935456 | rs6995598  | 8q24   | 8q24.21 |                                                     |                               | A G | 0.192 0.211 | 0.0442 | 1.17 | 1.00 | 1.36 |
| chr8  | 140745634 | rs3780040  | 8q24   | 8q24.3  | KCNK9                                               | intron                        | A C | 0.277 0.303 | 0.0444 | 1.14 | 1.00 | 1.31 |
| chr8  | 142578462 | rs2613636  | 8q24   | 8q24.3  | FLJ43860                                            | intron                        | C T | 0.339 0.367 | 0.0444 | 1.14 | 1.00 | 1.29 |
| chr8  | 134133955 | rs2252553  | 8q24   | 8q24.22 | TG,SLA,SLAP                                         | intron                        | G T | 0.444 0.421 | 0.0444 | 0.88 | 0.77 | 1.00 |
| chr7  | 93894152  | rs7805430  | COL1A2 | 7q21.3  | COL1A2                                              | intron                        | G A | 0.110 0.095 | 0.0447 | 0.81 | 0.66 | 1.00 |
| chr8  | 140201796 | rs11997682 | 8q24   | 8q24.3  |                                                     |                               | C T | 0.063 0.078 | 0.0451 | 1.26 | 1.00 | 1.58 |
| chr8  | 119208566 | rs13271779 | 8q24   | 8q24.12 |                                                     |                               | A G | 0.034 0.046 | 0.0452 | 1.36 | 1.01 | 1.85 |
| chr8  | 137848567 | rs2582475  | 8q24   | 8q24.23 |                                                     |                               | G A | 0.425 0.401 | 0.0452 | 0.88 | 0.78 | 1.00 |
| chr8  | 123625681 | rs4871275  | 8q24   | 8q24.13 |                                                     |                               | T C | 0.490 0.514 | 0.0453 | 1.13 | 1.00 | 1.28 |
| chr20 | 2972070   | rs6138991  | GNRH2  | 20p13   | PTPRA,GNRH2,M<br>RPS26                              | near-gene-5'                  | A G | 0.298 0.324 | 0.0456 | 1.14 | 1.00 | 1.30 |
| chr8  | 144242199 | rs6988480  | 8q24   | 8q24.3  |                                                     |                               | A G | 0.365 0.391 | 0.0456 | 1.14 | 1.00 | 1.29 |
| chr8  | 137877363 | rs2610104  | 8q24   | 8q24.23 |                                                     |                               | C T | 0.436 0.458 | 0.0460 | 1.13 | 1.00 | 1.27 |
| chr8  | 134201994 | rs3779951  | 8q24   | 8q24.22 | TG                                                  | intron                        | G A | 0.224 0.207 | 0.0460 | 0.85 | 0.73 | 1.00 |
| chr8  | 137756720 | rs894087   | 8q24   | 8q24.23 |                                                     |                               | T C | 0.278 0.304 | 0.0462 | 1.15 | 1.00 | 1.31 |
| chr8  | 128959443 | rs9656968  | 8q24   | 8q24.21 | PVT1                                                |                               | C A | 0.248 0.272 | 0.0462 | 1.15 | 1.00 | 1.32 |
| chr8  | 140023493 | rs13259487 | 8q24   | 8q24.3  |                                                     |                               | C T | 0.176 0.196 | 0.0465 | 1.17 | 1.00 | 1.37 |
| chr8  | 134153982 | rs2703004  | 8q24   | 8q24.22 | TG,SLA,SLAP                                         | intron                        | A G | 0.458 0.434 | 0.0467 | 0.88 | 0.78 | 1.00 |
| chr8  | 119978532 | rs13279492 | 8q24   | 8q24.12 |                                                     |                               | C T | 0.147 0.126 | 0.0467 | 0.84 | 0.70 | 1.00 |
| chr8  | 139744154 | rs4549820  | 8q24   | 8q24.23 | COL22A1                                             | intron                        | G A | 0.229 0.207 | 0.0467 | 0.86 | 0.74 | 1.00 |
| chr8  | 142994970 | rs7463711  | 8q24   | 8q24.3  |                                                     |                               | A G | 0.105 0.087 | 0.0472 | 0.80 | 0.64 | 1.00 |

|       |           |            |      |         |                         |                         |     |             |        |      |      |      |
|-------|-----------|------------|------|---------|-------------------------|-------------------------|-----|-------------|--------|------|------|------|
| chr8  | 125751030 | rs7016031  | 8q24 | 8q24.13 | MTSS1                   | intron                  | T C | 0.061 0.073 | 0.0472 | 1.28 | 1.00 | 1.63 |
| chr8  | 125628988 | rs6987343  | 8q24 | 8q24.13 | TATDN1,NDUFB9,<br>MTSS1 | intron                  | C A | 0.488 0.458 | 0.0473 | 0.88 | 0.78 | 1.00 |
| chr8  | 121345256 | rs17833457 | 8q24 | 8q24.12 | COL14A1                 | intron                  | T G | 0.147 0.166 | 0.0476 | 1.18 | 1.00 | 1.39 |
| chr8  | 132407635 | rs10103835 | 8q24 | 8q24.22 |                         |                         | T G | 0.134 0.152 | 0.0477 | 1.19 | 1.00 | 1.41 |
| chr8  | 140668408 | rs2111573  | 8q24 | 8q24.3  | KCNK9                   |                         | G A | 0.320 0.354 | 0.0477 | 1.14 | 1.00 | 1.30 |
| chr8  | 142596655 | rs7386137  | 8q24 | 8q24.3  |                         |                         | G T | 0.181 0.206 | 0.0479 | 1.16 | 1.00 | 1.35 |
| chr8  | 138205118 | rs7827430  | 8q24 | 8q24.23 |                         |                         | A G | 0.284 0.306 | 0.0481 | 1.14 | 1.00 | 1.31 |
| chr8  | 132319825 | rs6470909  | 8q24 | 8q24.22 |                         |                         | G A | 0.502 0.527 | 0.0482 | 1.13 | 1.00 | 1.29 |
| chr8  | 141473511 | rs7823724  | 8q24 | 8q24.3  | TRAPPC9                 | intron                  | A G | 0.016 0.024 | 0.0482 | 1.54 | 1.00 | 2.38 |
| chr8  | 143488622 | rs7387733  | 8q24 | 8q24.3  | TSNARE1                 |                         | C T | 0.170 0.145 | 0.0484 | 0.84 | 0.71 | 1.00 |
| chr8  | 120271074 | rs16892216 | 8q24 | 8q24.12 |                         |                         | G A | 0.108 0.131 | 0.0485 | 1.20 | 1.00 | 1.45 |
| chr8  | 138283160 | rs9644431  | 8q24 | 8q24.23 |                         |                         | T G | 0.396 0.421 | 0.0487 | 1.13 | 1.00 | 1.28 |
| chr8  | 130779820 | rs4733723  | 8q24 | 8q24.21 |                         |                         | C A | 0.368 0.341 | 0.0490 | 0.88 | 0.77 | 1.00 |
| chr6  | 152051947 | rs3020333  | ESR1 | 6q25.1  | ESR1                    |                         | A G | 0.462 0.431 | 0.0490 | 0.88 | 0.78 | 1.00 |
| chr8  | 133419508 | rs1020740  | 8q24 | 8q24.22 | KCNQ3                   | intron                  | G A | 0.282 0.305 | 0.0491 | 1.14 | 1.00 | 1.31 |
| chr8  | 133860293 | rs988068   | 8q24 | 8q24.22 | PHF20L1                 | intron                  | G A | 0.351 0.376 | 0.0492 | 1.13 | 1.00 | 1.28 |
| chr16 | 76258     | rs2541622  | MPG  | 16p13.3 | MPG,C16orf35            | near-gene-<br>3',UTR-3' | C T | 0.162 0.179 | 0.0494 | 1.18 | 1.00 | 1.39 |
| chr8  | 143382221 | rs10102944 | 8q24 | 8q24.3  | TSNARE1                 | intron                  | G A | 0.547 0.508 | 0.0495 | 0.88 | 0.77 | 1.00 |
| chr8  | 142599893 | rs873225   | 8q24 | 8q24.3  |                         |                         | T C | 0.197 0.224 | 0.0497 | 1.16 | 1.00 | 1.33 |
| chr8  | 138950621 | rs1949141  | 8q24 | 8q24.23 |                         |                         | T G | 0.222 0.199 | 0.0498 | 0.86 | 0.74 | 1.00 |

Results are shown for SNPs in candidate genes with a P value <0.05 based on analysis of Stage I data (694 osteosarcoma cases and 2,703 cancer-free adult controls). We examined SNPs in the following candidate genes/regions: 8q24, APTX, COL1A1, COL1A2, CTGF, ESR1, FANCM, FAS, FGF2, FGFR3, GH1, GNRH2, IGF1, IGF2R, MDM2, MPG, PARP2, TERF1, TGFBR1, TNF-a (our study did not include SNPs in this gene), TP53, VDR, XRCC5.

Abbreviations: OR, odds ratio; CI, confidence interval.

<sup>a</sup> Build 36 position; <sup>b</sup> Reference/Effect alleles; <sup>c</sup> Minor allele frequency in controls/cases.

## **Supplementary Figure 1: Study Design of Osteosarcoma GWAS**

Abbreviations: SPBC, Spanish Bladder Cancer study; CPSII, Cancer Prevention Study-II; EAGLE, WTCCC\_UK, Wellcome Trust Case-Control Cohort-UK; PLCO, Prostate, Lung, Colorectal and Ovarian cancer screening trial; COG, Children's Oncology Group; RNOH/UCL\_UK, Royal National Orthopaedic Hospital/University College London UK; CEU, CEPH European ancestry; AA, African American; NHS, Nurses Health Study; HSDM, Harvard School of Dental Medicine; *GRM4*, glutamate metabotropic

Supplementary Figure 1

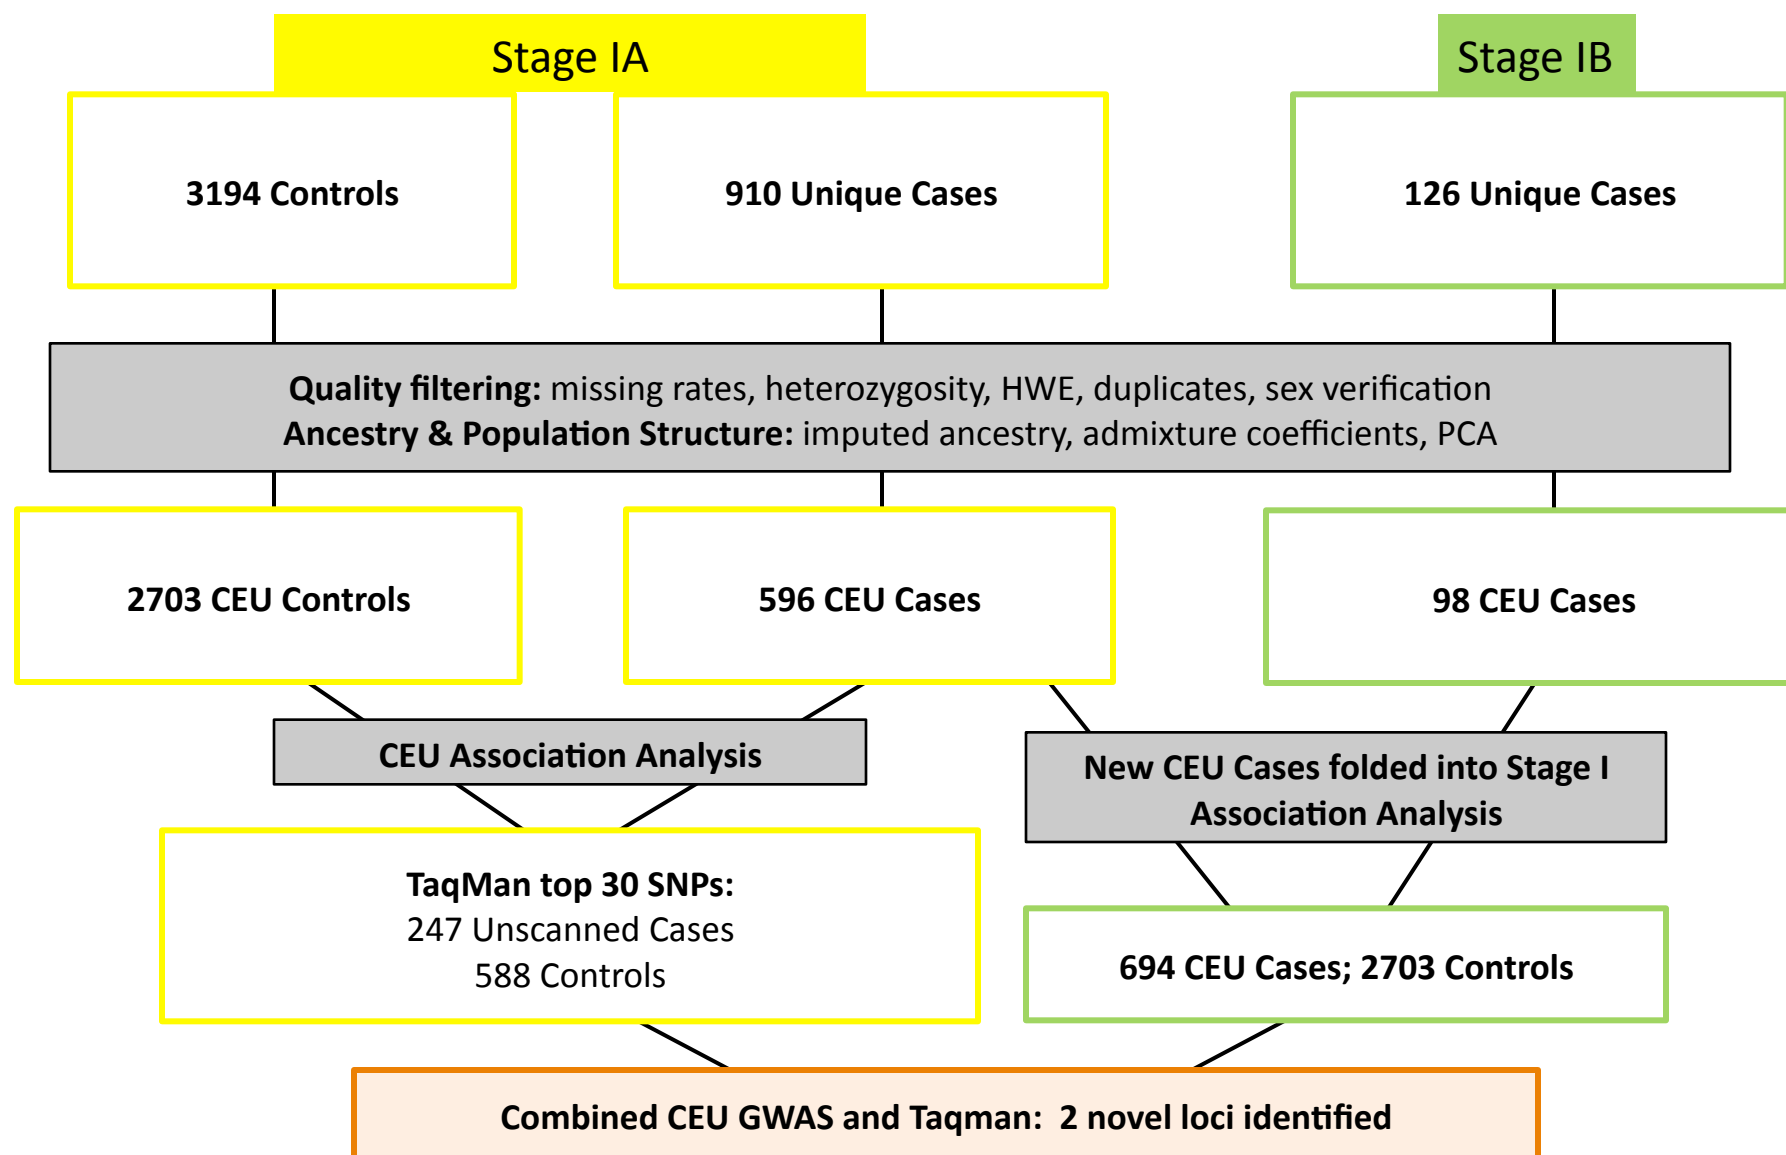



**Supplementary Figure 2: Plot of admixture by STRUCTURE analysis**

STRUCTURE analysis was conducted with uncorrelated 12,000 SNPs ( $r^2 < 0.01$ ) using HapMap3 (CEU, YRI and CHN/JPN). See Online Methods for details

Supplementary Figure 2

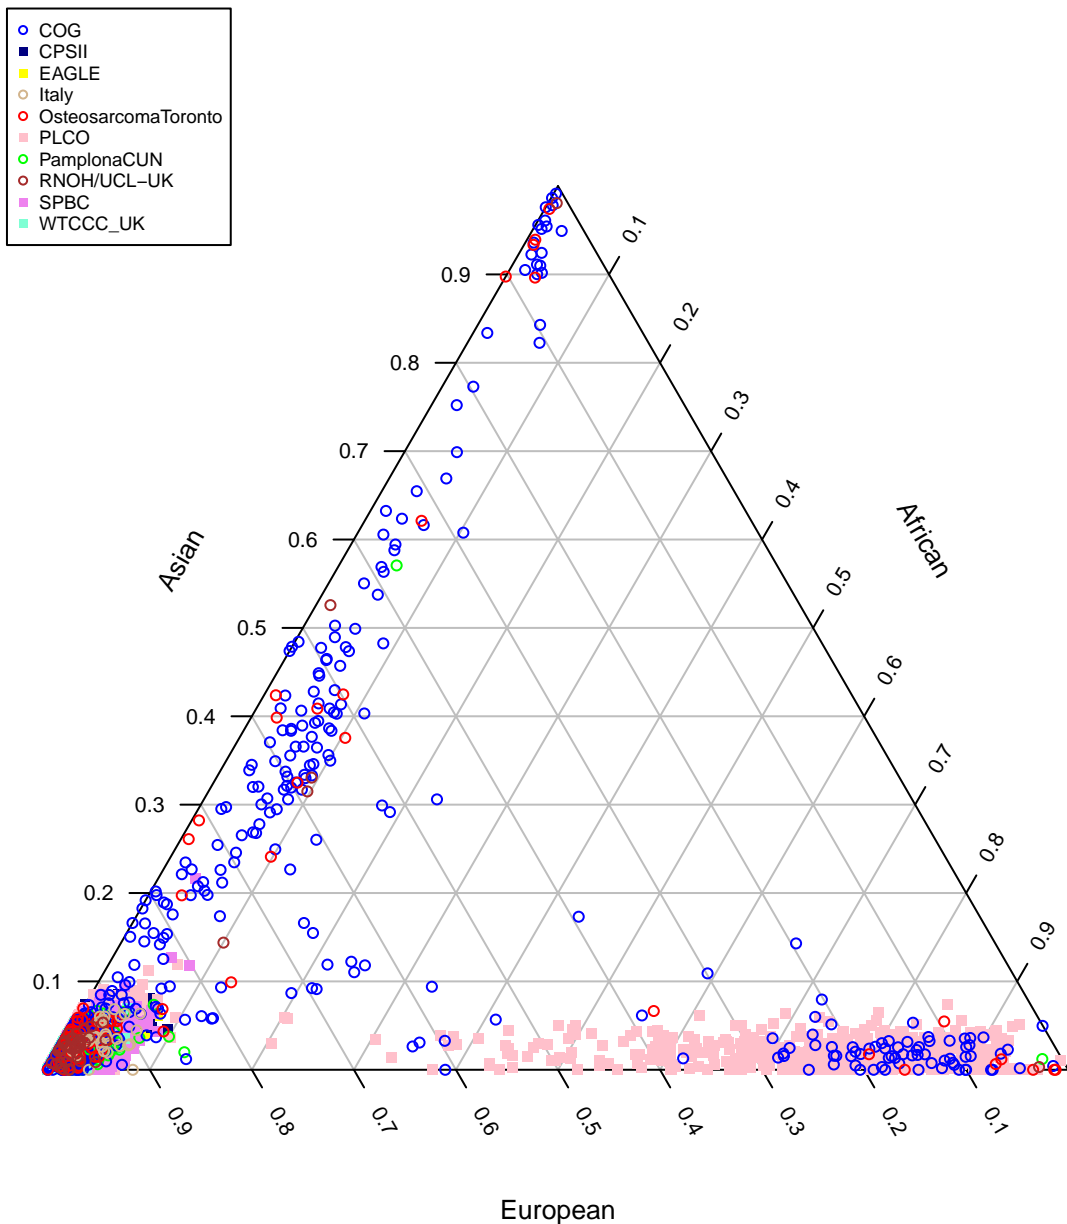

**Supplementary Figure 3: Principle component analysis (PCA) of osteosarcoma study**

Supplementary Figure 3

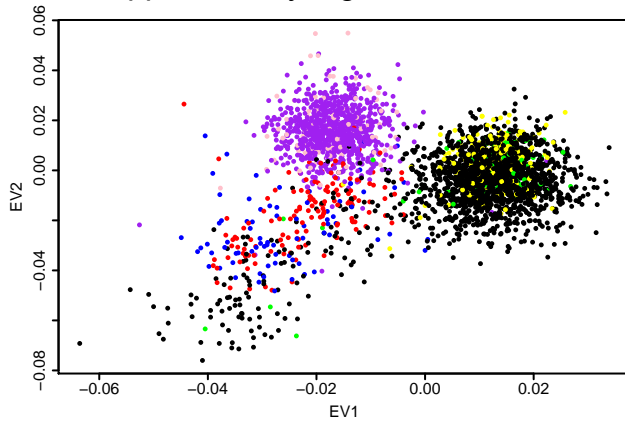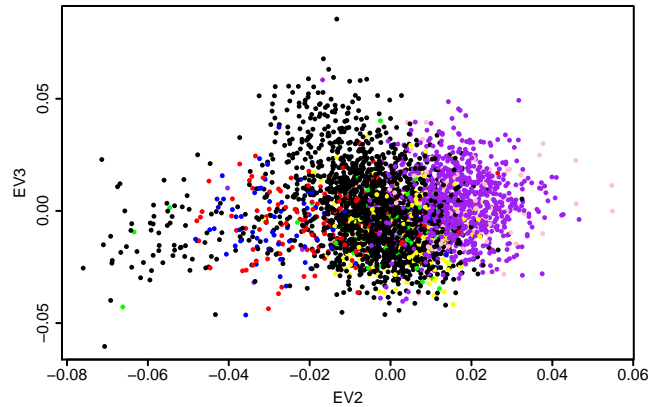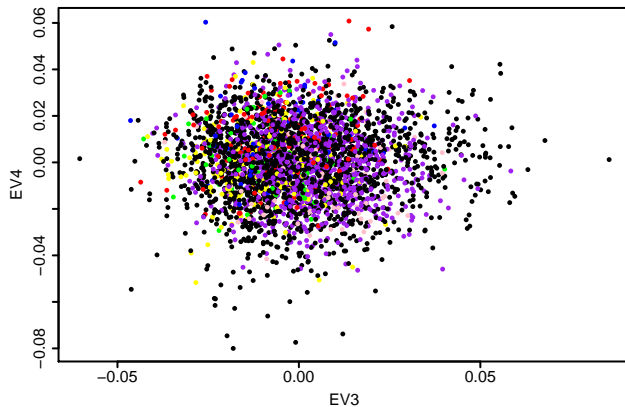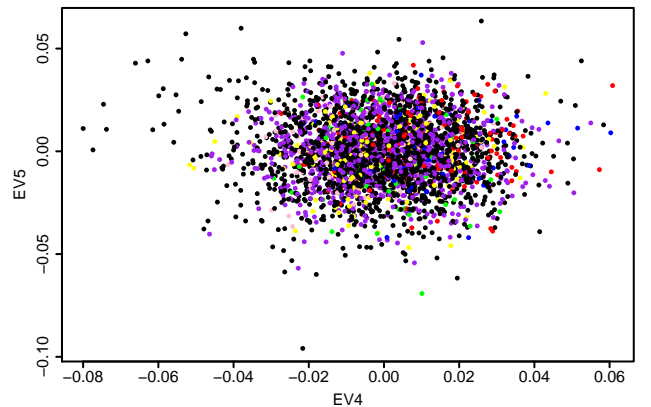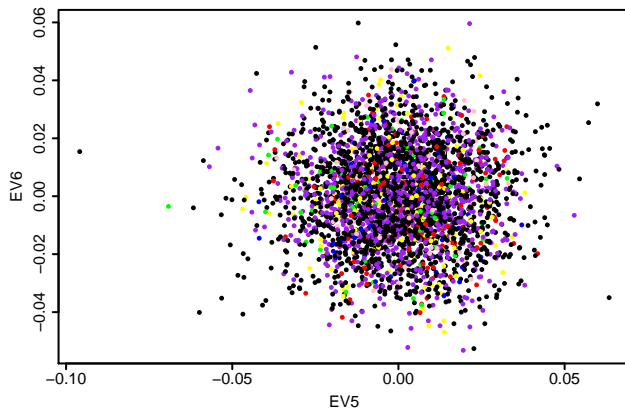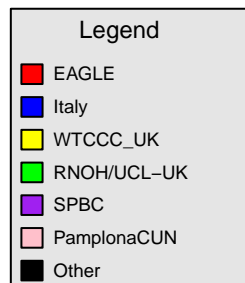

Supplementary Figure 3, continued

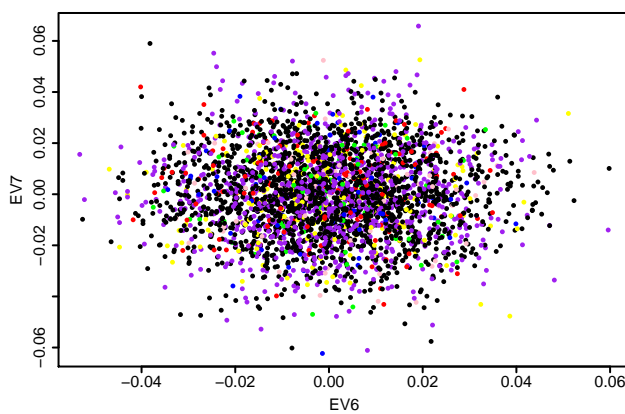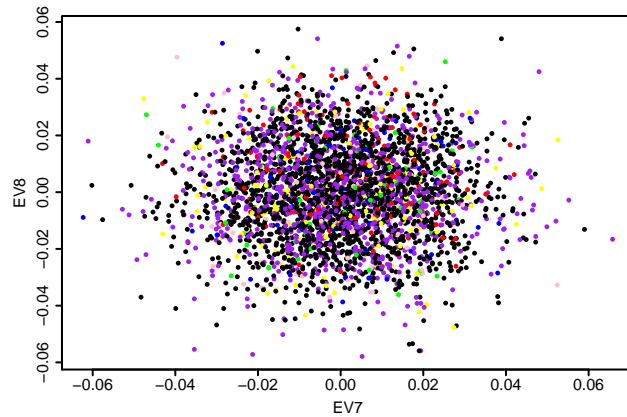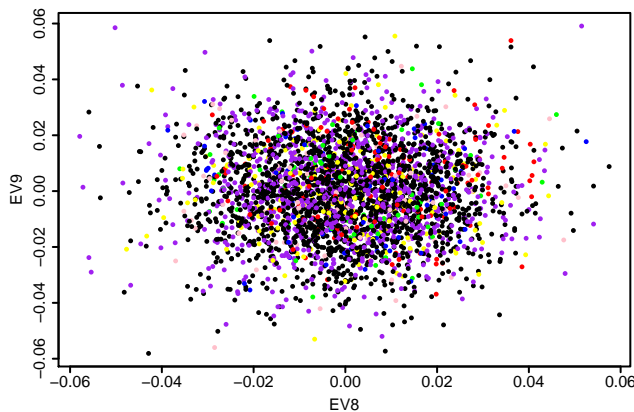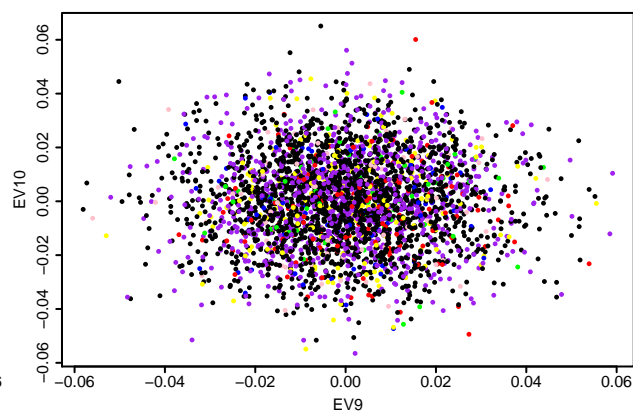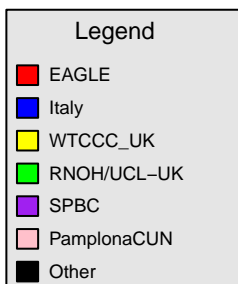

**Supplementary Figure 4: Imputation analysis across reported new regions.**

The  $-\log_{10}(P)$  (Y axis) for both genotyped SNPs (blue) and imputed SNPs (red) was plotted against the genomic coordinates (X axis; NCBI genome build 37). The imputed signals in each of three regions showed no substantial improvements over the genotyped signals. (a) 6p21.3 region (chr6: 33,036,446 -35,036,446); (b) 2p25.2 region (chr2: 5,461,421-7,461,421); and (c) 5q12.3 region (chr5: 63,447,777- 65,447,777). Note that the SNP imputation for the HLA locus may not be reliable mainly because there is extended long range LD in this region.

Supplementary Figure 4a

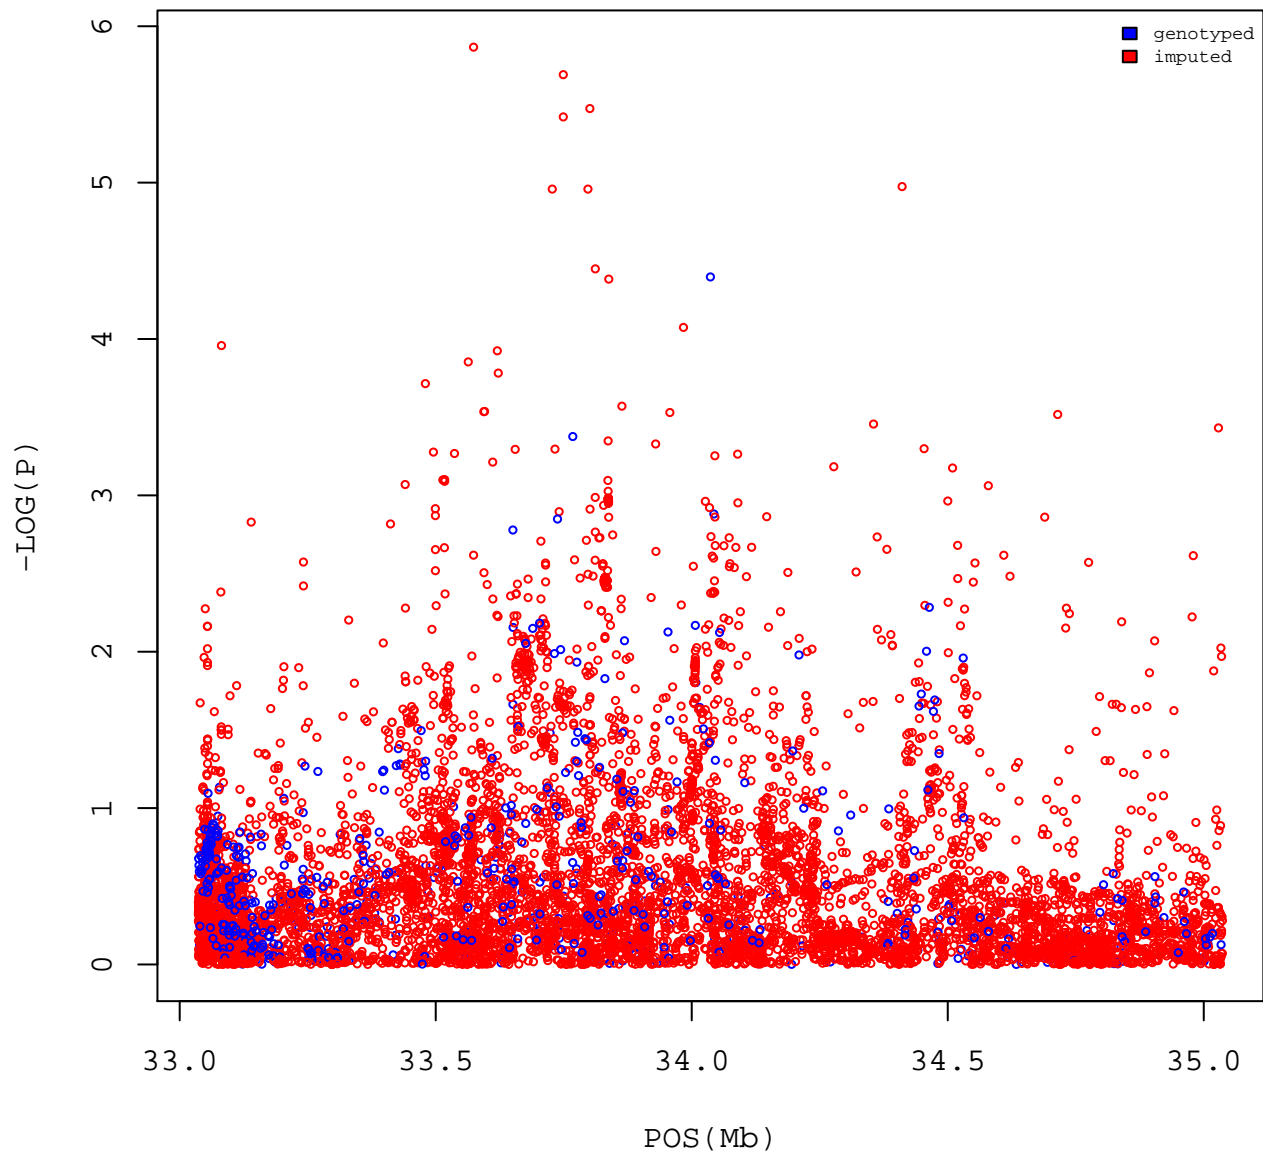

Supplementary Figure 4b

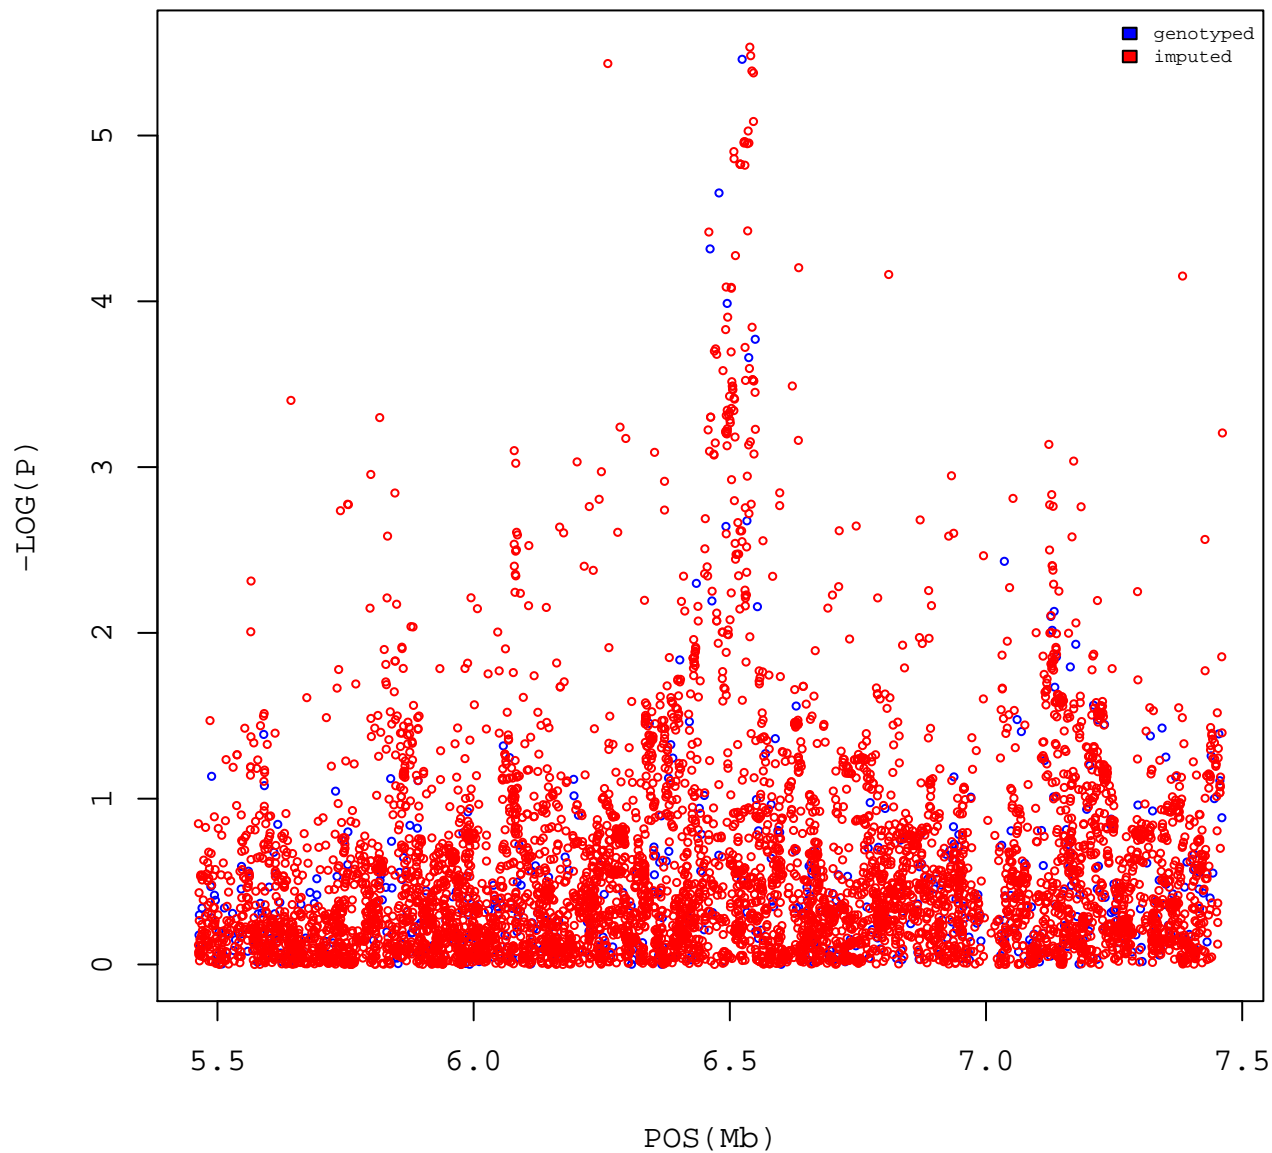



Supplementary Figure 4c

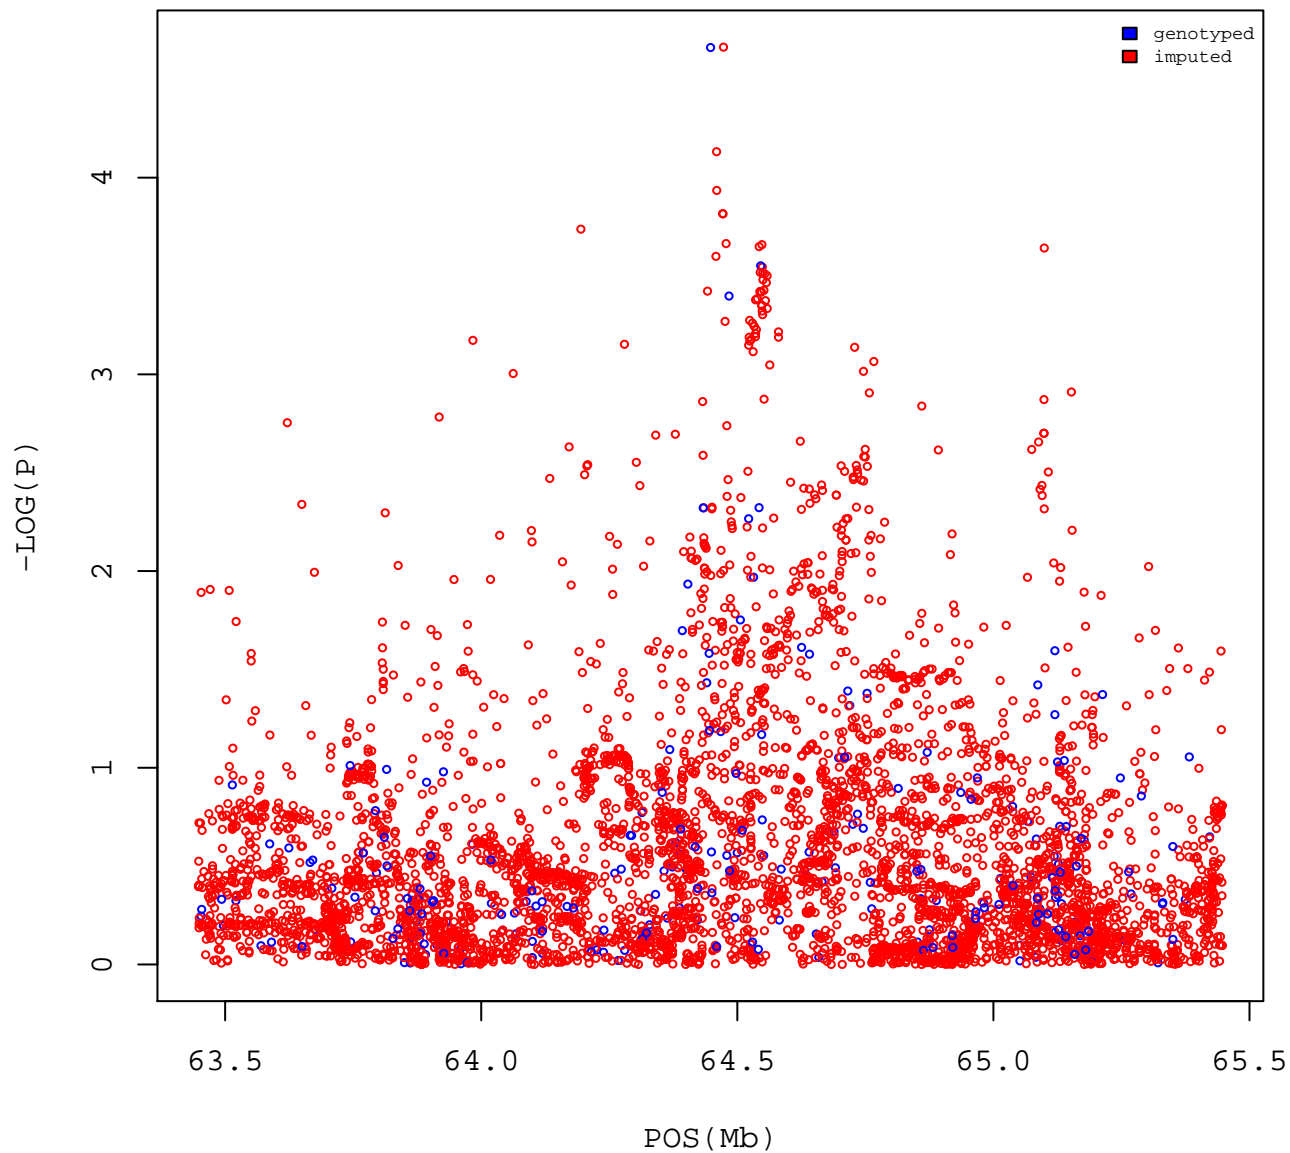

Supplement: NIHMS474981-supplement-1.pdf [file NIHMS474981-supplement-1.pdf]
